# Supplementary material for: Impact of high π-density on the coordination properties of π-excess aromatic neutral σ2P ligands – P(π)-donor bonds to Ag+and HgCl2
Source: Royal Society of Chemistry journal article supplement (doi:10.1039/c3dt52909f), 2013-10-22
Supplement: c3dt52909f.pdf [file c3dt52909f.pdf]

## Supplementary Electronic Information

### Impact of high $\pi$ -density on the coordination properties of $\pi$ -excess aromatic neutral $\sigma^2\text{P}$ ligands – P( $\pi$ )-donor bonds to $\text{Ag}^+$ and $\text{HgCl}_2$

Mohammed Ghalib,<sup>a</sup> László Könczöl,<sup>b</sup> László Nyulászi,<sup>\*b</sup> Peter G. Jones,<sup>\*c</sup> Gottfried J. Palm,<sup>d</sup> and Joachim W. Heinicke<sup>\*a</sup>

<sup>a</sup> Ernst-Moritz-Arndt-Universität Greifswald, Institut für Biochemie (Anorganische Chemie), Felix-Hausdorff-Str. 4, 17487 Greifswald (Germany), E-mail: [heinicke@uni-greifswald.de](mailto:heinicke@uni-greifswald.de)

<sup>b</sup> Department of Inorganic Chemistry and Analytical Chemistry, Budapest University of Technology and Economics (Hungary)

<sup>c</sup> Institut für Anorganische und Analytische Chemie, Technische Universität Braunschweig, Postfach 3329, D-38023 Braunschweig (Germany)

<sup>d</sup> Ernst-Moritz-Arndt-Universität Greifswald, Institut für Biochemie (Molekulare Strukturbiologie), Felix-Hausdorff-Str. 4, 17487 Greifswald (Germany)

1. Experimental details
2. NMR spectra of the new compounds
3. Background and detailed data of quantum chemical calculations
4. Details of crystal structure determination of **2** and **5**, CCDC numbers and data tables (for **5** with figure of the packing in the crystal).

#### 1. Experimental details

*General.* All operations were carried out under nitrogen in carefully dried, freshly distilled solvents using standard Schlenk techniques and glassware heat-dried in vacuum. NMR spectra were measured on a multinuclear FT-NMR spectrometer ARX300 (Bruker) at 300.1 ( $^1\text{H}$ ), 75.5 ( $^{13}\text{C}$ ), and 121.5 ( $^{31}\text{P}$ ) MHz. Shift references are tetramethylsilane for  $^1\text{H}$  and  $^{13}\text{C}$  and  $\text{H}_3\text{PO}_4$  (85%) for  $^{31}\text{P}$ ,  $\delta$  values are given in ppm. Coupling constants refer to  $J_{\text{HH}}$  unless indicated otherwise. Mass spectra were measured on a single focussing sector-field

spectrometer AMD40, high-resolution mass spectra on a double-focussing sector field mass spectrometer MAT 95 (Fa. Finnigan) with EI (70 eV) or ESI. Melting points (uncorrected) were determined with a Sanyo Gallenkamp melting point apparatus, elemental analyses with a Vario Micro Cube CHN analyzer from Elementar under standard conditions. 1-Neopentyl-1,3-benzazaphosphole (**1**) was synthesized by a modification of a known procedure,<sup>[1]</sup> using a catalytic amount of Me<sub>3</sub>SiCl (ca. 0.1 mL) in the cyclocondensation with dimethylformamide dimethylacetal. This shortens the reaction time from 7 to 1d, yield 76%.

#### **μ-Bis[di(1-neopentyl-1*H*-1,3-benzazaphosphol)silver chloride] (**2**).**

Toluene (20 mL) was added to a Schlenk flask, charged with **1** (100 mg, 0.49 mmol) and AgCl (70 mg, 0.49 mmol). The mixture was cooled to -60 °C and dry ammonia added by condensation to dissolve AgCl. After 40 min the mixture was slowly warmed to room temperature. The colour of the solution turned from pale brown to red-brown, and NH<sub>3</sub> vaporized. The mixture was filtered, the solvent removed in vacuum (finally <1 Torr) and the remaining brown oil (65 mg, 48%) crystallized by dissolving it in a small amount of THF and overlaying with hexanes. The white crystals decomposed rapidly on contact with air (turning brown) and slowly in CD<sub>3</sub>OD (turning black), but they were stable for several days in the dark in the presence of mother liquor. <sup>1</sup>H-NMR (CD<sub>3</sub>OD): δ = 0.92 (s, 9 H, CMe<sub>3</sub>), 4.10 (s, 2 H, NCH<sub>2</sub>), 7.31 (tdd, <sup>3</sup>J = 7.8, 7.0, <sup>4</sup>J<sub>PH</sub> = 2.1, <sup>4</sup>J = 0.9 Hz, 1 H, H-5), 7.38 (ddt, <sup>3</sup>J = 8.4, 7.1, <sup>4</sup>J ≈ <sup>5</sup>J<sub>PH</sub> = 1.2 Hz, 1 H, H-6), 7.74 (dd, <sup>3</sup>J = 8.7, <sup>4</sup>J = 0.9 Hz, 1 H, H-7), 7.79 (dddd, <sup>3</sup>J = 7.8, <sup>3</sup>J<sub>PH</sub> = 5.1, <sup>4</sup>J = 1.2, <sup>5</sup>J = 0.9 Hz, 1 H, H-4), 8.45 (d, <sup>2</sup>J<sub>PH</sub> = 38.4 Hz, 1 H, H-2). <sup>13</sup>C{<sup>1</sup>H}-NMR (CD<sub>3</sub>OD): δ = 28.46 (s, CMe<sub>3</sub>), 35.26 (s, CMe<sub>3</sub>), 61.55 (DEPT d, <sup>3</sup>J = 2.4 Hz, NCH<sub>2</sub>), 115.52 (s, C-7), 121.58 (d, <sup>3</sup>J = 11.9 Hz, C-5), 125.81 (DEPT d, <sup>4</sup>J = 2.2 Hz, C-6), 129.74 (d, <sup>2</sup>J = 21.2 Hz, C-4), 142.32 (d, <sup>1</sup>J = 31.9 Hz, C<sub>q</sub>-3a), 144.98 (d, <sup>2</sup>J = 4.0 Hz, C<sub>q</sub>-7a), 166.32 (d, <sup>1</sup>J = 43.8 Hz, C<sub>q</sub>-2). <sup>31</sup>P{<sup>1</sup>H}-NMR (CD<sub>3</sub>OD): δ = 51.9 ppm (s). For details and data of crystal structure analysis see below.

#### **Reaction of **1** with AgSbF<sub>6</sub> in THF (1:1 molar ratio) to neopentyl-1*H*-1,3-benzazaphosphole silver(I)-hexafluoroantimonate THF solvate (**3**).**

A Schlenk tube was charged with **1** (90.3 mg, 0.44 mmol) and AgSbF<sub>6</sub> (151.2 mg, 0.44 mmol), and THF (10 mL) was added at room temperature. The colour turned rapidly to pale brown, and soon a dark brown to black precipitate was formed. The mixture was stirred for 24 h, the precipitate filtered off and the solvent removed in vacuum to give 173 mg (79%) of a white to pale brown solid with an elemental analysis corresponding to (**1**)(AgSbF<sub>6</sub>)<sub>2</sub>(THF)<sub>1.5</sub>. Slow evaporation of its solution in CD<sub>3</sub>OD led to white to pale brown crystals. NMR data and

elemental analysis fitted best with the composition  $\text{Ag}(\mathbf{1})\text{SbF}_6 \cdot (\text{THF})_{1.3}$ . The crystals decomposed in the mother liquor within few days.  $^1\text{H-NMR}$  ( $\text{CD}_3\text{OD}$ ):  $\delta = 1.00$  (s, 9 H,  $\text{CMe}_3$ ), 4.38 (s, 2 H,  $\text{NCH}_2$ ), 7.47 (br td,  $^3J = 7.4$ ,  $^4J_{\text{PH}} = 2.6$  Hz, 1 H, H-5), 7.64 (tt,  $^3J = 8.7$ , 7.5,  $^4J = ^5J_{\text{PH}} = 1.5$  Hz, 1 H, H-6), 8.00 (br t,  $^3J \approx ^3J_{\text{PH}} = 7.5$ , 7.2 Hz, 1 H, H-4), 8.06 (d,  $^3J = 8.7$  Hz, 1 H, H-7), 9.33 (d,  $^2J_{\text{PH}} = 39.9$  Hz, 1 H, H-2); 1.86 (m, 5.2 H,  $\text{CH}_2$ , 1.3 THF), 3.72 (m, 4.4 H,  $\text{OCH}_2$ , 1.1 THF<sub>A</sub>); 3.45 (m, 0.8 H,  $\text{OCH}_2$ , 0.2 THF<sub>B</sub>).  $^{13}\text{C}\{^1\text{H}\}$ -NMR ( $\text{CD}_3\text{OD}$ ):  $\delta = 28.42$  (s,  $\text{CMe}_3$ ), 35.58 (s,  $\text{CMe}_3$ ), 63.25 (s,  $\text{NCH}_2$ ), 118.28 (br s, C-7), 125.80 (d,  $^3J = 11.9$  Hz, C-5), 128.65 (d,  $^4J = 2.7$  Hz, C-6), 129.67 (d,  $^2J = 18.6$  Hz, C-4), 139.63 (d,  $^1J = 5.3$  Hz, C<sub>q</sub>-3a), 145.97 (br s, C<sub>q</sub>-7a), 173.00 (d,  $^1J = 22.6$  Hz, C-2); 26.49 (s,  $\text{CH}_2$ , THF), 68.95 (s,  $\text{OCH}_2$ , THF); 27.43 (s,  $\text{CH}_2$ , THF<sub>coord</sub>), 71.67 (s,  $\text{OCH}_2$ , THF<sub>coord</sub>).  $^{31}\text{P}\{^1\text{H}\}$ -NMR ( $\text{CD}_3\text{OD}$ ):  $\delta = -5.9$  ppm (s). Elemental analysis of  $(\mathbf{1})(\text{AgSbF}_6)_2(\text{THF})_{1.5}$ : calcd. for  $\text{C}_{18}\text{H}_{28}\text{Ag}_2\text{F}_{12}\text{NO}_{1.5}\text{PSb}_2$  (1000.63): C 21.60, H 2.82, N 1.40; found: C 21.20, H 3.15, N 1.53. Elemental analysis of crystals from  $\text{CD}_3\text{OD}$ : calcd. for  $(\mathbf{1})\text{AgSbF}_6 \cdot 1.3$  THF (642.59): 32.15, H 4.14, N 2.18; found: C 31.94, H 4.08, N 2.35.

A crystal structure study (G. Palm) of a freshly prepared sample of **3** performed with a diffractometer optimized for the investigation of biomacromolecules, allowed the detection of the formation of a tetrameric benzazaphosphole silver complex (Figure S1) with four asymmetric units per unit cell ( $\text{P2}_1/\text{c}$ ). The Ag- and P-atoms form an eight-membered ring (P-Ag-P 145 and 138°, Ag-P-Ag 110 and 127°), in which one P lies slightly above and the opposite P slightly below the plane. The aromatic planes of the benzazaphospholes are perpendicular to the Ag-P ring. The N-neopentyl groups of two neighbouring ligands face upwards, the other two downwards. Two Ag that coordinate a P above the Ag-P plane additionally coordinate one F each of a  $\mu^2$ - $\text{SbF}_6^-$  below the plane and vice versa. Each Ag also coordinates one THF molecule. In total each  $\text{Ag}^+$  is coordinated by a trigonal pyramid of two benzazaphospholes (Ag-P 2.4 - 2.5 Å), THF (Ag-O 2.5 - 2.6 Å) and  $\text{SbF}_6^-$  (Ag-F 2.7 - 2.8 Å) with apical F. Unclear residual electron density, probably from THF and  $\text{SbF}_6^-$ , prevented adequate refinement for the presentation of detailed structure data.

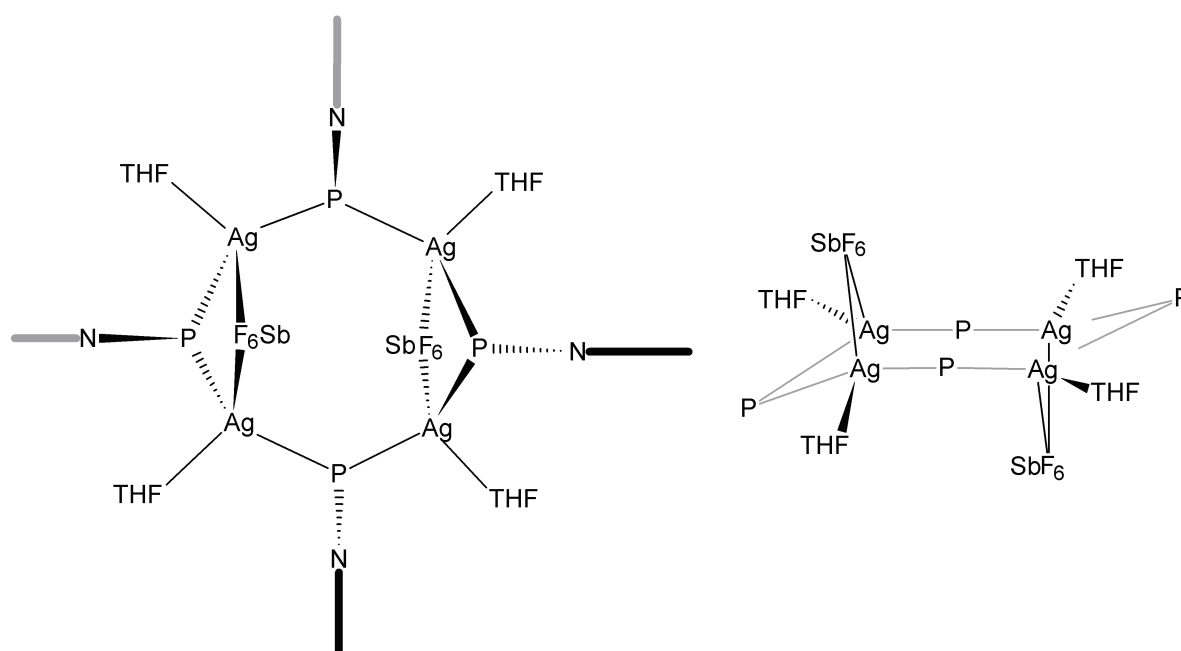

Figure S1. Schematic presentation of the structure of **3**.

### Synthesis of (5-methyl-2-(2-diphenylphosphanyl)phenyl-1,3-benzazaphosphol-*P,P'*)-mercury(II)chloride (**5**).

THF (10 mL) was added to a Schlenk flask, charged with 2-(2-diphenylphosphanylphenyl)-5-methyl-*1H*-1,3-benzazaphosphole (**4**)<sup>[2]</sup> (94.2 mg, 0.23 mmol) and a slight excess of HgCl<sub>2</sub> (74.9 mg, 0.276 mmol). After few minutes the colour turned to orange-yellow, and precipitation began. The mixture was stirred at room temperature for 24 h, whereafter an insoluble solid was separated by filtration and washed with a small amount of THF. Removal of the solvent gave 103 mg (66%) yellow solid. Slow concentration of a solution in THF-*d*<sub>8</sub> provided single crystals. <sup>1</sup>H-NMR ([D<sub>8</sub>]THF): δ = 2.32 (s, 3 H, 5-Me), 7.13 (br d, <sup>3</sup>*J* = 8.7 Hz, 1 H, H-7), 7.31 (br t, <sup>3</sup>*J* = 8.7 Hz, 1 H, H-6), 7.40-7.63 (m, 14 H, aryl-H), 7.74 (br t, <sup>3</sup>*J* = 7.5 Hz, 1 H, aryl-H), 7.85 (br t, <sup>3</sup>*J* = 7.2, <sup>3</sup>*J*<sub>PH</sub> = 5.1 Hz, 1 H, H-4), 12.33 (s br, 1 H, NH). <sup>13</sup>C{<sup>1</sup>H}-NMR ([D<sub>8</sub>]THF): δ = 21.66 (s, 5-Me), 116.14 (s, C-7), 127.22 (d, <sup>1</sup>*J* = 50.4 Hz, C<sub>q</sub>-2'), 128.58 (d, <sup>2</sup>*J* = 19.9 Hz, C-4), 128.67 (d, <sup>1</sup>*J* = 46.4 Hz, 2 C<sub>q</sub>-i), 129.24 (DEPT d, <sup>4</sup>*J* = 2.2 Hz, C-6), 130.28 (d, *J* = 8.0 Hz, C-4'), 130.66 (d, <sup>3</sup>*J* = 11.9 Hz, 4 C-m), 131.93 (τ, |<sup>2</sup>*J* + <sup>4</sup>*J*| = 10.6 Hz, C6'), 132.36 (d, <sup>3</sup>*J* = 11.9 Hz, C<sub>q</sub>-5), 133.27 (d, *J* = 2.2 Hz, 2 C-*p*), 133.44 (s, C-5'), 135.14 (d, <sup>2</sup>*J* = 14.6 Hz, 4 C-*o*), 137.14 (DEPT d, *J* = 3.3 Hz, C3'), 140.55 (τ, |<sup>1</sup>*J* + <sup>3</sup>*J*| = 29.2 Hz, C<sub>q</sub>-1'), 142.40 (d, *J* = 38.5 Hz, C<sub>q</sub>-3a), 144.11 (d, <sup>2</sup>*J* = 6.6 Hz, C<sub>q</sub>-7a), 173.51 (br d, <sup>1</sup>*J* = 53 Hz, C<sub>q</sub>-2). <sup>31</sup>P{<sup>1</sup>H}-NMR ([D<sub>8</sub>]THF, 25 °C): δ = 19.0 (vbr), 58.0 ppm (d, <sup>2</sup>*J*<sub>PP</sub> = 105.4 Hz). Analysis calcd. for C<sub>26</sub>H<sub>21</sub>Cl<sub>2</sub>HgNP<sub>2</sub> (680.90): C 45.86, H 3.11, N 2.06; found: C 45.27, H 3.03, N 2.07. MS (ESI in MeOH): calcd. for [M(<sup>202</sup>Hg)+MeOH]<sup>+</sup> 713.05; found 713.08

(and correct relative intensities of the isotopic peaks). For details and data of crystal structure analysis see below.

### Detection of 1-neopentyl-1*H*-1,3-benzazaphosphole mercury(II)chloride.

Dichloromethane (DCM; 10 mL) was added to a mixture of **1** (88 mg, 0.43 mmol) and excess HgCl<sub>2</sub> (467 mg, 1.72 mmol, 4.0 eq.) at room temperature to give a turbid yellow solution. After few minutes a solid precipitated. After stirring for 1d the solid was filtered off and washed with DCM. The solvent was removed from the filtrate to give 160 mg (50 %) yellow solid. Attempts to crystallize the substance by solution in a small amount of THF and overlayering with DCM furnished a solid that decomposed within few days. <sup>1</sup>H-NMR (CD<sub>2</sub>Cl<sub>2</sub>): δ = 1.09 (s, 9 H, CMe<sub>3</sub>), 4.61 (br s, 2 H, NCH<sub>2</sub>), 7.57 (td, <sup>3</sup>J = 7.5, 7.2, <sup>4</sup>J<sub>PH</sub> = 2.5 Hz, 1 H, H-5), 7.69 (br td, <sup>3</sup>J = 8.4, 7.4, <sup>4</sup>J = 1.2 Hz, 1 H, H-6), 7.94 (d, <sup>3</sup>J = 8.3 Hz, H-7), 8.25 (ddd, <sup>3</sup>J = 7.5, <sup>3</sup>J<sub>PH</sub> = 4.5, <sup>4</sup>J = 1.1 Hz, 1 H, H-4), 9.84 (d, <sup>2</sup>J<sub>PH</sub> = 32.1 Hz, 1 H, H-2). <sup>13</sup>C{<sup>1</sup>H}-NMR (CD<sub>2</sub>Cl<sub>2</sub>): δ = 28.32 (s, CMe<sub>3</sub>), 34.65 (s, CMe<sub>3</sub>), 64.45 (s, NCH<sub>2</sub>), 117.96 (s, C-7), 127.53 (d, <sup>3</sup>J = 9.3 Hz, C-5), 129.51 (s, C-6), 131.36 (d, <sup>2</sup>J = 19.8 Hz, C-4), 137.60 (d, <sup>1</sup>J = 22.6 Hz, C<sub>q</sub>-3a), 147.11 (d, <sup>2</sup>J = 2.7 Hz, C<sub>q</sub>-7a), 185.72 (d, <sup>1</sup>J = 41.1 Hz, CH). <sup>31</sup>P{<sup>1</sup>H}-NMR (CD<sub>2</sub>Cl<sub>2</sub>): δ = -14.0 ppm (s). Analysis calcd. for C<sub>12</sub>H<sub>16</sub>Cl<sub>2</sub>HgNP + HgCl<sub>2</sub> (748.23): C 19.26, H 2.16, N 1.87; found: C 16.58 (combustion incomplete), H 1.98, N 1.71.

In contrast to the above-mentioned silver complexes, the HgCl<sub>2</sub> complex adds rapidly methanol at the P=C bond when treated with or synthesized in this solvent.

### Detection of 3-methoxy-1-neopentyl-2,3-dihydro-1,3-benzazaphosphole coordinated at HgCl<sub>2</sub>.

Methanol (10 mL) was added at room temperature to a mixture of **1** (53 mg, 0.26 mmol) and excess HgCl<sub>2</sub> (175 mg, 0.645 mmol, 2.5 eq.). After stirring for 1d the solid was filtered off and methanol removed from the filtrate to give 102 mg of a colourless viscous oil. The NMR data show a mixture of diastereoisomers (ca. 85:10 mol%) and some contamination by **1** (5 mol% based on *t*Bu proton integration). <sup>1</sup>H-NMR (C<sub>6</sub>D<sub>6</sub>): δ = 0.68 (s, 9 H, CMe<sub>3</sub>), 2.22 (d, <sup>2</sup>J = 14.7 Hz, NCH<sub>a</sub>), 2.68 (d, <sup>2</sup>J = 14.7, <sup>4</sup>J<sub>PH</sub> = 2.2 Hz, NCH<sub>b</sub>), 3.03 (d, <sup>2</sup>J = 14, <sup>2</sup>J<sub>PH</sub> = 11.6 Hz, PCH<sub>a</sub>N), 3.14 (d, <sup>2</sup>J = <sup>2</sup>J<sub>PH</sub> = 14.0 Hz, PCH<sub>b</sub>N), 3.41 (d, <sup>1</sup>J = 11.3 Hz, 3 H, POCH<sub>3</sub>), 6.43 (dd, <sup>3</sup>J = 8.5, <sup>4</sup>J<sub>PH</sub> = 4.7 Hz, 1 H, H-7), 6.55 (br td, <sup>3</sup>J = 7.2, <sup>4</sup>J<sub>PH</sub> = 3.0 Hz, 1 H, H-5), 7.09 (tt, <sup>3</sup>J = 8.7, 7.5, <sup>4</sup>J = <sup>5</sup>J<sub>PH</sub> = 1.2 Hz, 1 H, H-6), 7.51 (ddd, <sup>3</sup>J<sub>PH</sub> = 11.3, <sup>3</sup>J = 7.6, <sup>4</sup>J = 1.1 Hz, 1 H, H-4). <sup>13</sup>C{<sup>1</sup>H}-NMR (C<sub>6</sub>D<sub>6</sub>): δ = 28.75 (s, CMe<sub>3</sub>), 34.87 (s, CMe<sub>3</sub>), 51.67 (br d, <sup>2</sup>J = 6 Hz (DEPT 6.6 Hz), POME), 51.80 (d, <sup>1</sup>J = 100.8 Hz, PCH<sub>2</sub>N), 63.35 (d, <sup>3</sup>J = 8.0 Hz, NCH<sub>2</sub>), 110.99 (d, <sup>3</sup>J = 11.9 Hz, C-7), 114.72 (d, <sup>1</sup>J = 127.4 Hz, C<sub>q</sub>-3a), 118.05 (d, <sup>3</sup>J = 11.9 Hz, C-5), 129.29 (d,

$^2J = 6.6$  Hz, C-4), 134.80 (s, C-6), 157.34 (d,  $^2J = 23.9$  Hz, C<sub>q</sub>-7a).  $^{31}\text{P}\{^1\text{H}\}$ -NMR (C<sub>6</sub>D<sub>6</sub>):  $\delta = 50.52$  (s), 49.9 (sh) ppm.

### Acknowledgements

Funding by DFG and Deutscher Akademischer Austausch Dienst (B.N.) is gratefully acknowledged. We thank G. Thede, M. Steinich and Dr. M. K. Kindermann for NMR and LRMS, Dr. H. Frauendorf and G. Sommer-Udvarnoki (Georg-August-Universität Göttingen, Institut für Organische und Biomolekulare Chemie) for HRMS measurements. Support from OTKA K 105417 and the Jedlik fellowship (LK) is also gratefully acknowledged.

### References

- [1] B. R. Aluri, M. K. Kindermann, P. G. Jones, I. Dix, J. W. Heinicke, *Inorg. Chem.*, **2008**, *47*, 6900-6912.
- [2] B. Niaz, M. Ghalib, P. G. Jones, J. W. Heinicke, *Dalton Trans.* **2013**, *42*, 9523-9532.

## 2. NMR spectra of the new compounds

$^1\text{H}$  NMR Spectrum of compound **2** in  $\text{CD}_3\text{OD}$  ( $\text{Np} = \text{CH}_2\text{CMe}_3$ ).

|                        |                      |                      |                                                                                                              |                       |              |
|------------------------|----------------------|----------------------|--------------------------------------------------------------------------------------------------------------|-----------------------|--------------|
| Acquisition Time (sec) | 5.2953               | Comment              | Ghalib:M128a 1H-Spektrum Loesungsmittel: CD3OD Referenz: LM=3.31 ppm Messzeit: 10 min. EMAU, Avance II - 300 |                       |              |
| Date                   | 07 Dec 2010 14:00:48 | Date Stamp           | 07 Dec 2010 14:00:48                                                                                         |                       |              |
| File Name              | H:\                  | Frequency (MHz)      | 300.13                                                                                                       | Nucleus               | $^1\text{H}$ |
| Number of Transients   | 96                   | Origin               | spect                                                                                                        | Original Points Count | 32768        |
| Points Count           | 16384                | Pulse Sequence       | zg30                                                                                                         | Receiver Gain         | 101.00       |
| Solvent                | METHANOL-d4          | Spectrum Offset (Hz) | 1849.4720                                                                                                    | Spectrum Type         | STANDARD     |
| Temperature (degree C) | 24.300               | Sweep Width (Hz)     | 6187.74                                                                                                      |                       |              |

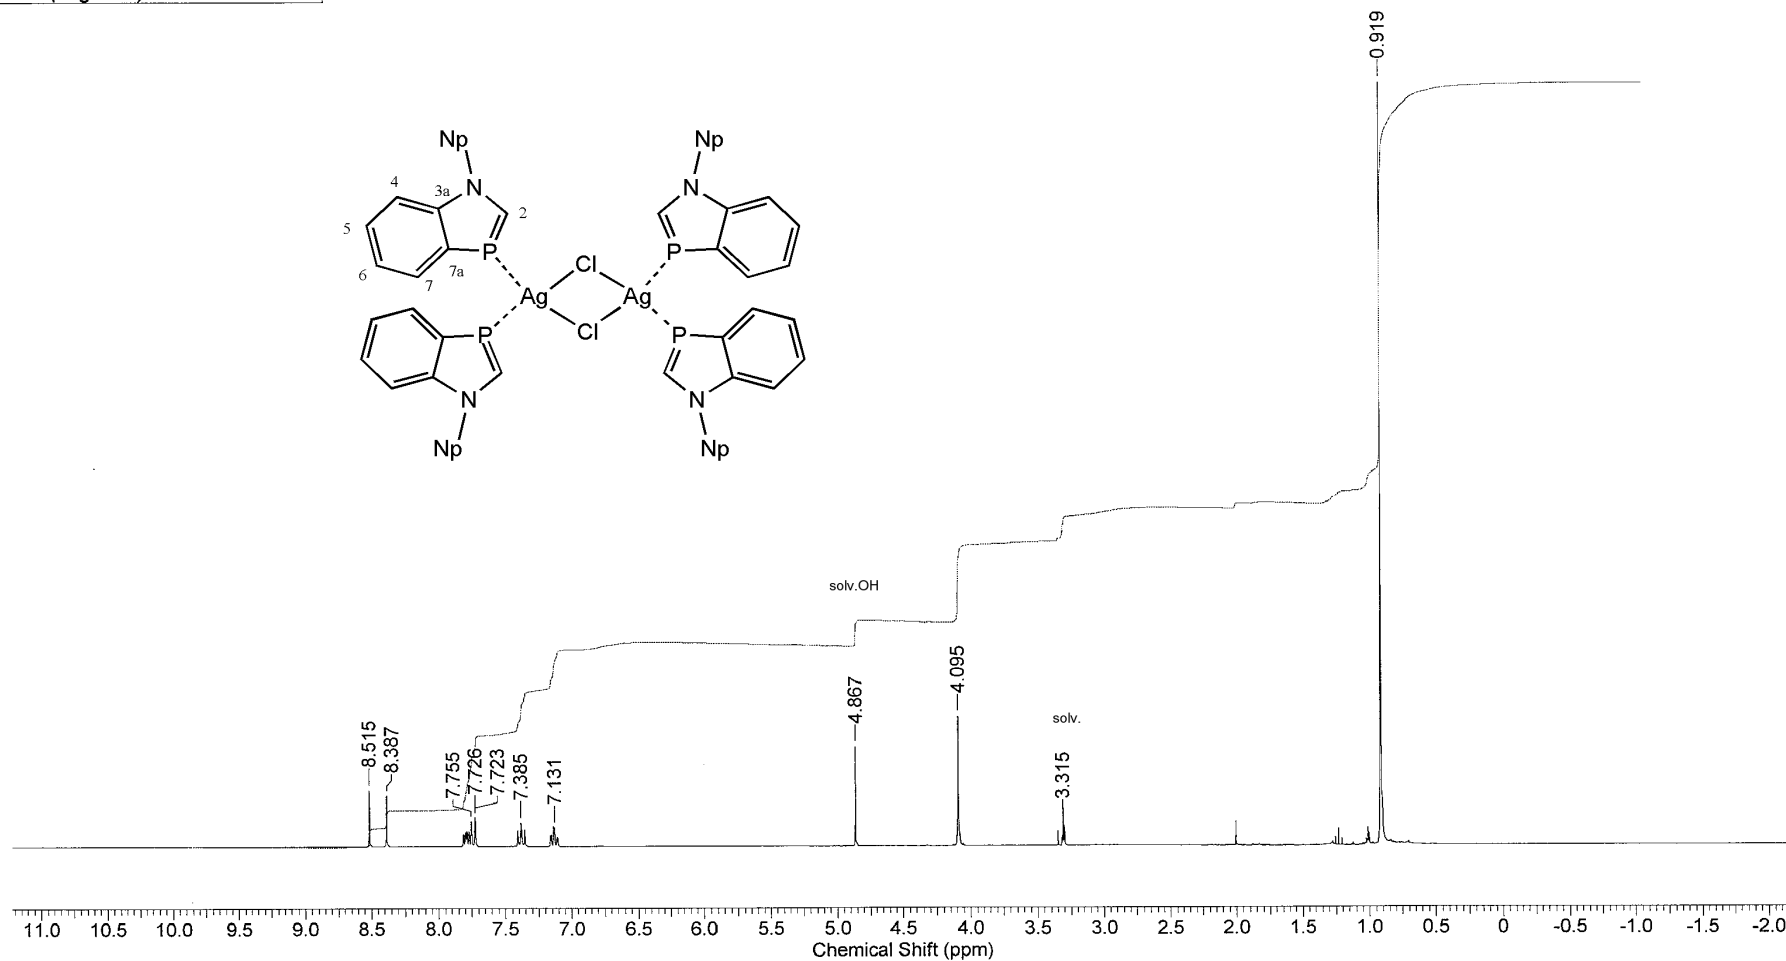

$^{13}\text{C}\{^1\text{H}\}$  NMR Spectrum of compound **2** in  $\text{CD}_3\text{OD}$  ( $\text{Np} = \text{CH}_2\text{CMe}_3$ ).

|                        |                      |                      |                                                                                                                                                        |                       |                 |
|------------------------|----------------------|----------------------|--------------------------------------------------------------------------------------------------------------------------------------------------------|-----------------------|-----------------|
| Acquisition Time (sec) | 0.7537               | Comment              | M. Ghalib: M128a $^{13}\text{C}\{^1\text{H}\}$ -NMR-Spektrum LM: CD3OD Referenz: LM = 49.00 ppm Messzeit: 13 Stunden und 42 min. EMAU, AVANCE II - 300 |                       |                 |
| Date                   | 08 Dec 2010 09:06:24 | Date Stamp           | 08 Dec 2010 09:06:24                                                                                                                                   |                       |                 |
| File Name              | H:\                  | Frequency (MHz)      | 75.47                                                                                                                                                  | Nucleus               | $^{13}\text{C}$ |
| Number of Transients   | 15977                | Origin               | spect                                                                                                                                                  | Original Points Count | 16384           |
| Points Count           | 16384                | Pulse Sequence       | zgpg30                                                                                                                                                 | Receiver Gain         | 32800.00        |
| Solvent                | METHANOL-d4          | Spectrum Offset (Hz) | 8464.0068                                                                                                                                              | Spectrum Type         | STANDARD        |
| Temperature (degree C) | 24.500               | SW(cyclical) (Hz)    | 21739.13                                                                                                                                               |                       |                 |
|                        |                      | Sweep Width (Hz)     | 21737.80                                                                                                                                               |                       |                 |

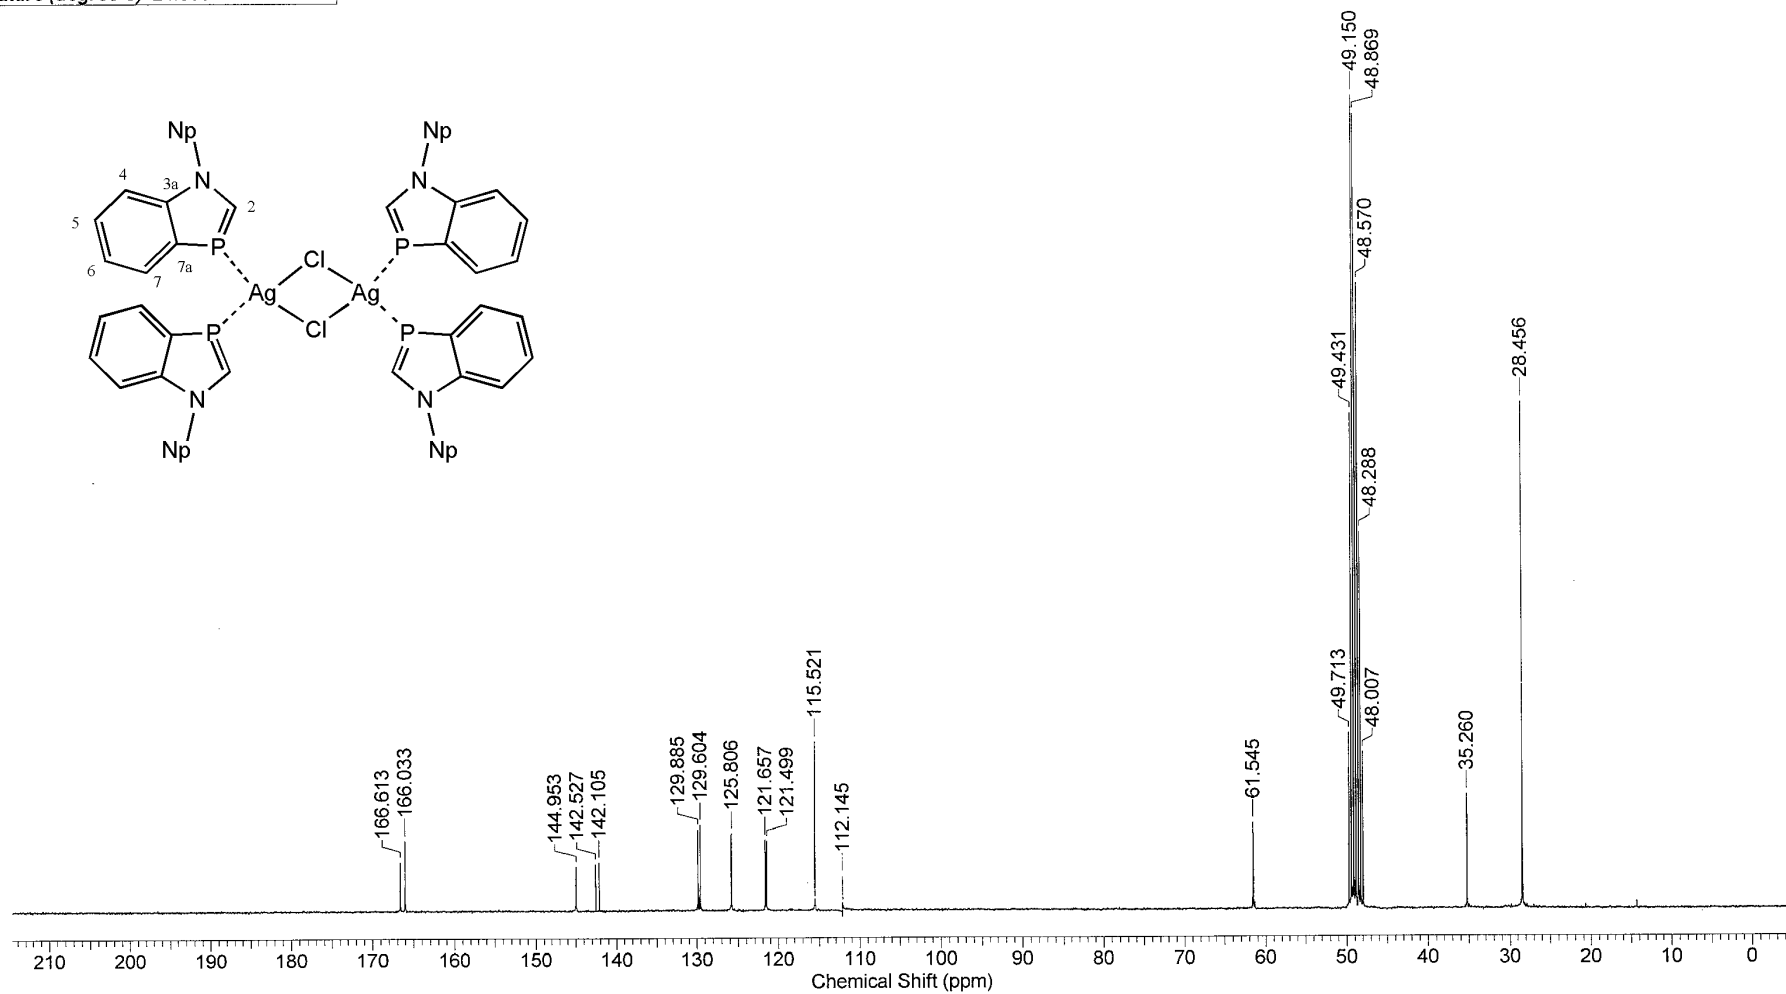



$^{31}\text{P}\{^1\text{H}\}$  NMR Spectrum of compound **2** in  $\text{CD}_3\text{OD}$  ( $\text{Np} = \text{CH}_2\text{CMe}_3$ ).

|                        |                                                                                                                                                        |                      |                      |                       |          |                   |          |
|------------------------|--------------------------------------------------------------------------------------------------------------------------------------------------------|----------------------|----------------------|-----------------------|----------|-------------------|----------|
| Acquisition Time (sec) | 1.3107                                                                                                                                                 |                      |                      |                       |          |                   |          |
| Comment                | Ghalib:M128a 31P{1H}-NMR-Spektrum Loesungsmittel: CD3OD Ref.: extern, H3PO4 (Kapillare in Methanol-d4) = 0.0 ppm Messzeit 15min. EMAU, Avance II - 300 |                      |                      |                       |          |                   |          |
| Date                   | 07 Dec 2010 14:17:52                                                                                                                                   | Date Stamp           | 07 Dec 2010 14:17:52 |                       |          |                   |          |
| File Name              | H:\                                                                                                                                                    | Frequency (MHz)      | 121.49               | Nucleus               | 31P      |                   |          |
| Number of Transients   | 256                                                                                                                                                    | Origin               | spect                | Original Points Count | 65536    | Owner             | nmr      |
| Points Count           | 65536                                                                                                                                                  | Pulse Sequence       | zgpg30               | Receiver Gain         | 23100.00 | SW(cyclical) (Hz) | 50000.00 |
| Solvent                | METHANOL-d4                                                                                                                                            | Spectrum Offset (Hz) | 632.1547             | Spectrum Type         | STANDARD | Sweep Width (Hz)  | 49999.24 |
| Temperature (degree C) | 24.600                                                                                                                                                 |                      |                      |                       |          |                   |          |

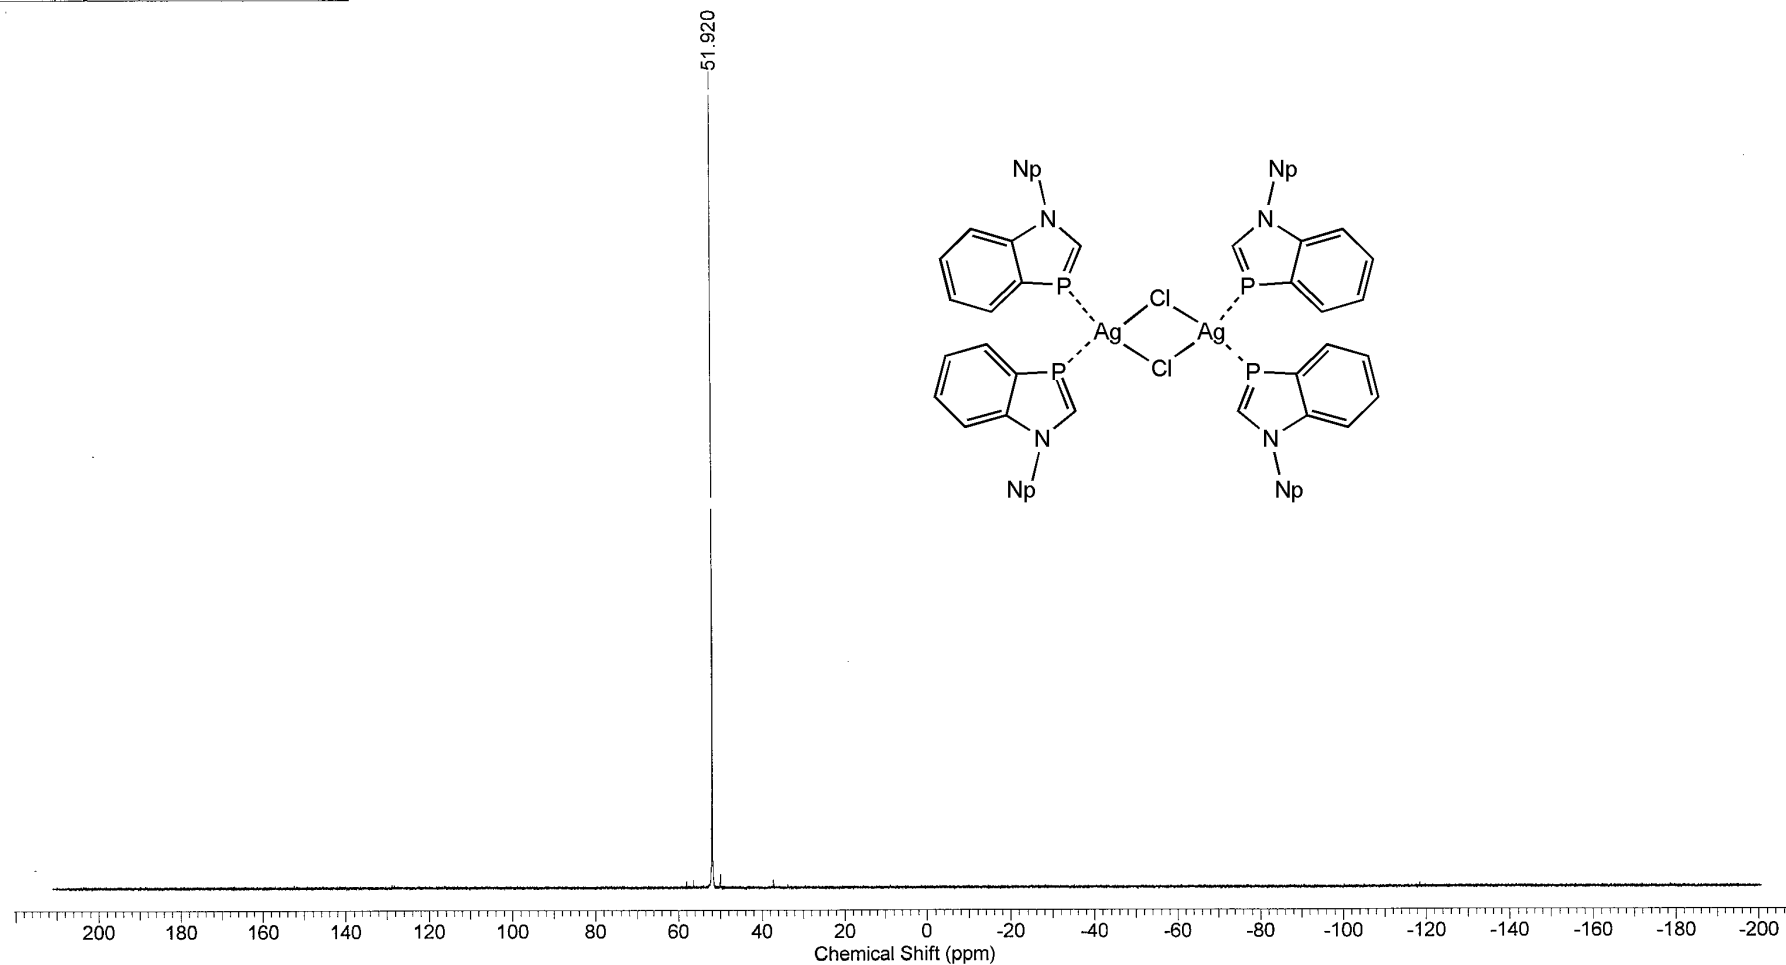

### <sup>1</sup>H NMR Spectrum of compound 3 CD<sub>3</sub>OD.

|                        |                      |                        |                                                                                                                    |                      |           |
|------------------------|----------------------|------------------------|--------------------------------------------------------------------------------------------------------------------|----------------------|-----------|
| Acquisition Time (sec) | 5.2953               | Comment                | M. Ghalib: M114F1 1H-Spektrum Loesungsmittel: CD3OD Referenz: LM= 3.31 ppm Messzeit: 10 min. EMAU, Avance II - 300 |                      |           |
| Date                   | 08 Oct 2010 13:14:08 | Date Stamp             | 08 Oct 2010 13:14:08                                                                                               |                      |           |
| File Name              | C:\                  |                        |                                                                                                                    | Frequency (MHz)      | 300.13    |
| Nucleus                | 1H                   | Number of Transients   | 32                                                                                                                 | Origin               | spect     |
| Owner                  | nmr                  | Points Count           | 16384                                                                                                              | Pulse Sequence       | zg30      |
| SW(cyclical) (Hz)      | 6188.12              | Solvent                | METHANOL-d4                                                                                                        | Spectrum Offset (Hz) | 1849.0933 |
| Sweep Width (Hz)       | 6187.74              | Temperature (degree C) | 24.900                                                                                                             | Spectrum Type        | STANDARD  |

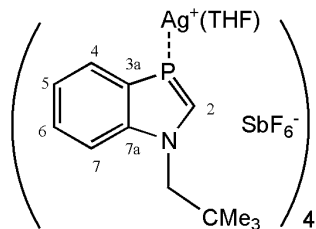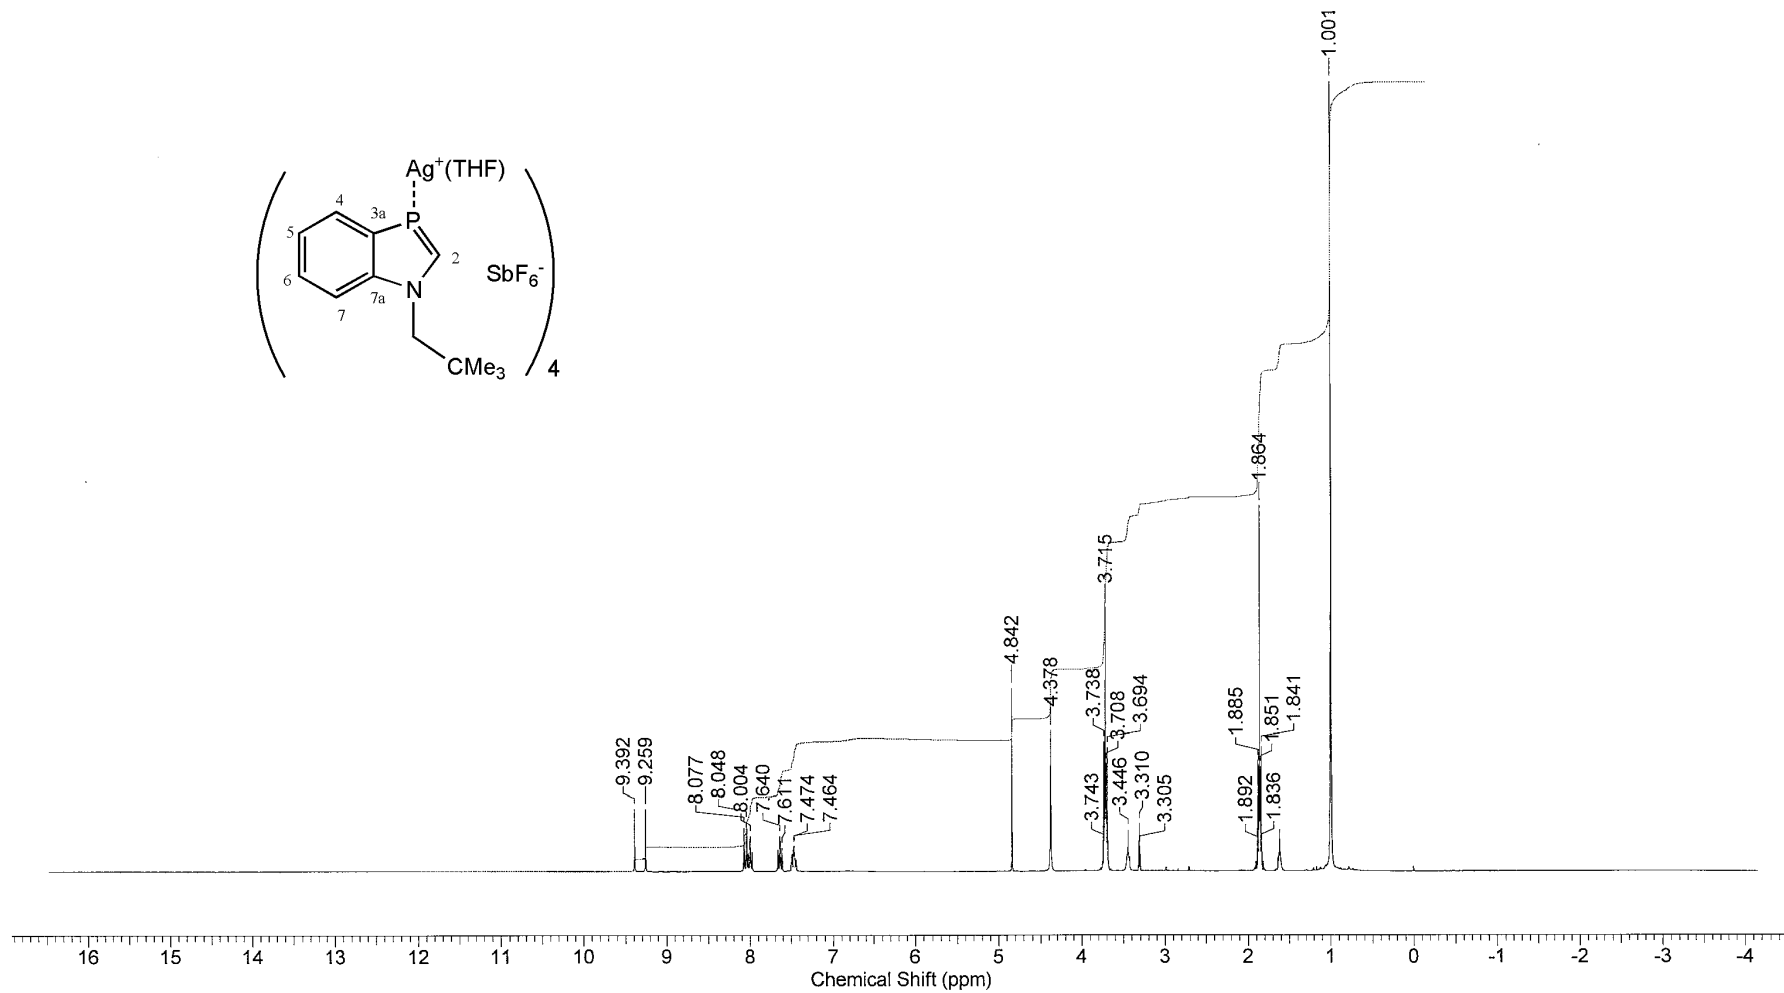

$^{13}\text{C}\{^1\text{H}\}$  NMR Spectrum of compound **3** in  $\text{CD}_3\text{OD}$ .

|                        |                      |                        |                                                                                                                                                 |                       |           |
|------------------------|----------------------|------------------------|-------------------------------------------------------------------------------------------------------------------------------------------------|-----------------------|-----------|
| Acquisition Time (sec) | 0.7537               | Comment                | M. Ghalib: M114F1 $^{13}\text{C}\{^1\text{H}\}$ -NMR-Spektrum LM: Methanol Referenz: LM = 49.0 ppm Messzeit: 16,5 Stunden EMAU, AVANCE II - 300 |                       |           |
| Date                   | 09 Oct 2010 06:52:16 | Date Stamp             | 09 Oct 2010 06:52:16                                                                                                                            |                       |           |
| File Name              | C:\                  |                        |                                                                                                                                                 | Frequency (MHz)       | 75.47     |
| Nucleus                | $^{13}\text{C}$      | Number of Transients   | 20480                                                                                                                                           | Origin                | spect     |
| Owner                  | nmr                  | Points Count           | 16384                                                                                                                                           | Original Points Count | 16384     |
| SW(cyclical) (Hz)      | 21739.13             | Solvent                | METHANOL-d4                                                                                                                                     | Pulse Sequence        | zgpg30    |
| Sweep Width (Hz)       | 21737.80             | Temperature (degree C) | 24.900                                                                                                                                          | Spectrum Offset (Hz)  | 8474.6221 |
|                        |                      |                        |                                                                                                                                                 | Receiver Gain         | 32800.00  |
|                        |                      |                        |                                                                                                                                                 | Spectrum Type         | STANDARD  |

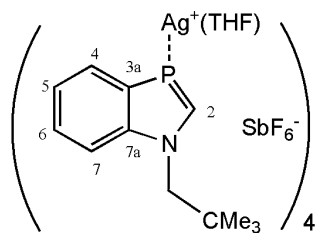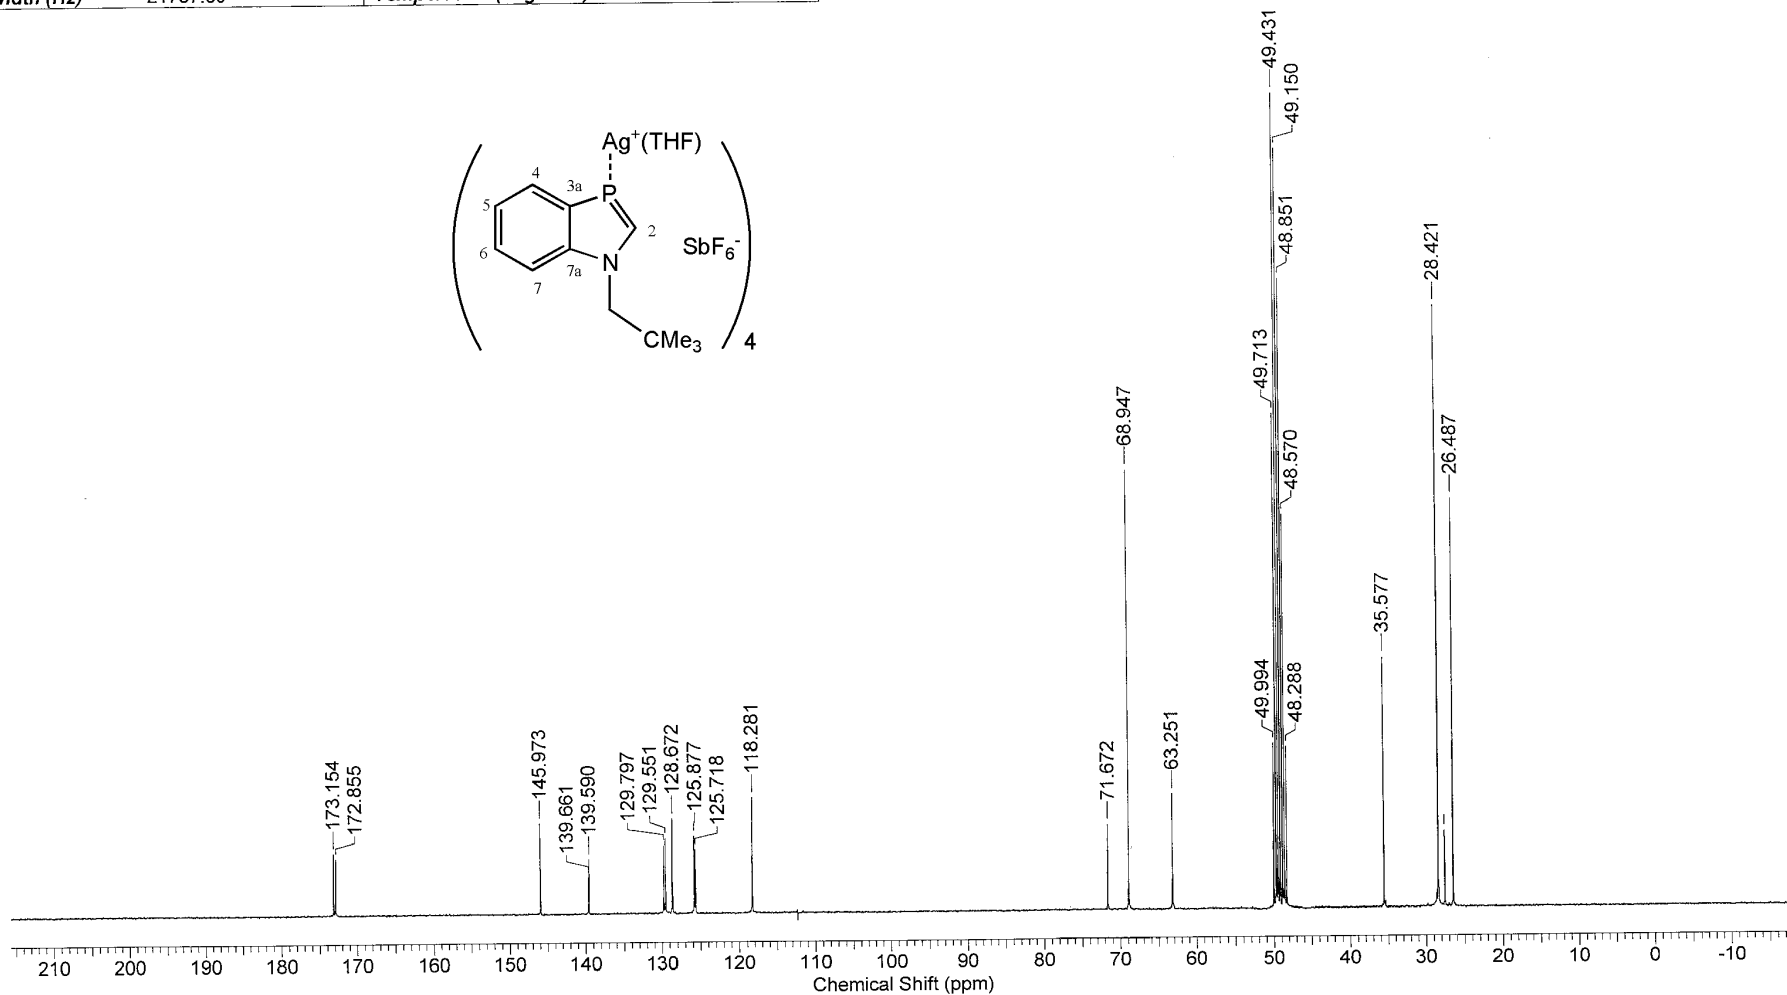

### $^{31}\text{P}\{^1\text{H}\}$ NMR Spectrum of compound **3** in $\text{CD}_3\text{OD}$ .

|                        |                                                                                                                                                           |                        |                      |                      |          |                       |          |
|------------------------|-----------------------------------------------------------------------------------------------------------------------------------------------------------|------------------------|----------------------|----------------------|----------|-----------------------|----------|
| Acquisition Time (sec) | 1.3107                                                                                                                                                    |                        |                      |                      |          |                       |          |
| Comment                | Ghalib:M114F1 31P{1H}-NMR-Spektrum Loesungsmittel: CD3OD Messzeit: 10 min. Ref.: extern, H3PO4 (Kapillare in Methanol-d4) = 0.0 ppm EMAU, Avance II - 300 |                        |                      |                      |          |                       |          |
| Date                   | 08 Oct 2010 13:29:04                                                                                                                                      | Date Stamp             | 08 Oct 2010 13:29:04 |                      |          |                       |          |
| File Name              | C:\                                                                                                                                                       |                        |                      | Frequency (MHz)      | 121.49   |                       |          |
| Nucleus                | 31P                                                                                                                                                       | Number of Transients   | 256                  | Origin               | spect    | Original Points Count | 65536    |
| Owner                  | nmr                                                                                                                                                       | Points Count           | 65536                | Pulse Sequence       | zgpg30   | Receiver Gain         | 23100.00 |
| SW(cyclical) (Hz)      | 50000.00                                                                                                                                                  | Solvent                | METHANOL-d4          | Spectrum Offset (Hz) | 632.1547 | Spectrum Type         | STANDARD |
| Sweep Width (Hz)       | 49999.24                                                                                                                                                  | Temperature (degree C) | 25.100               |                      |          |                       |          |

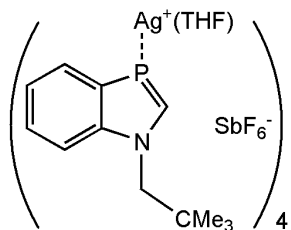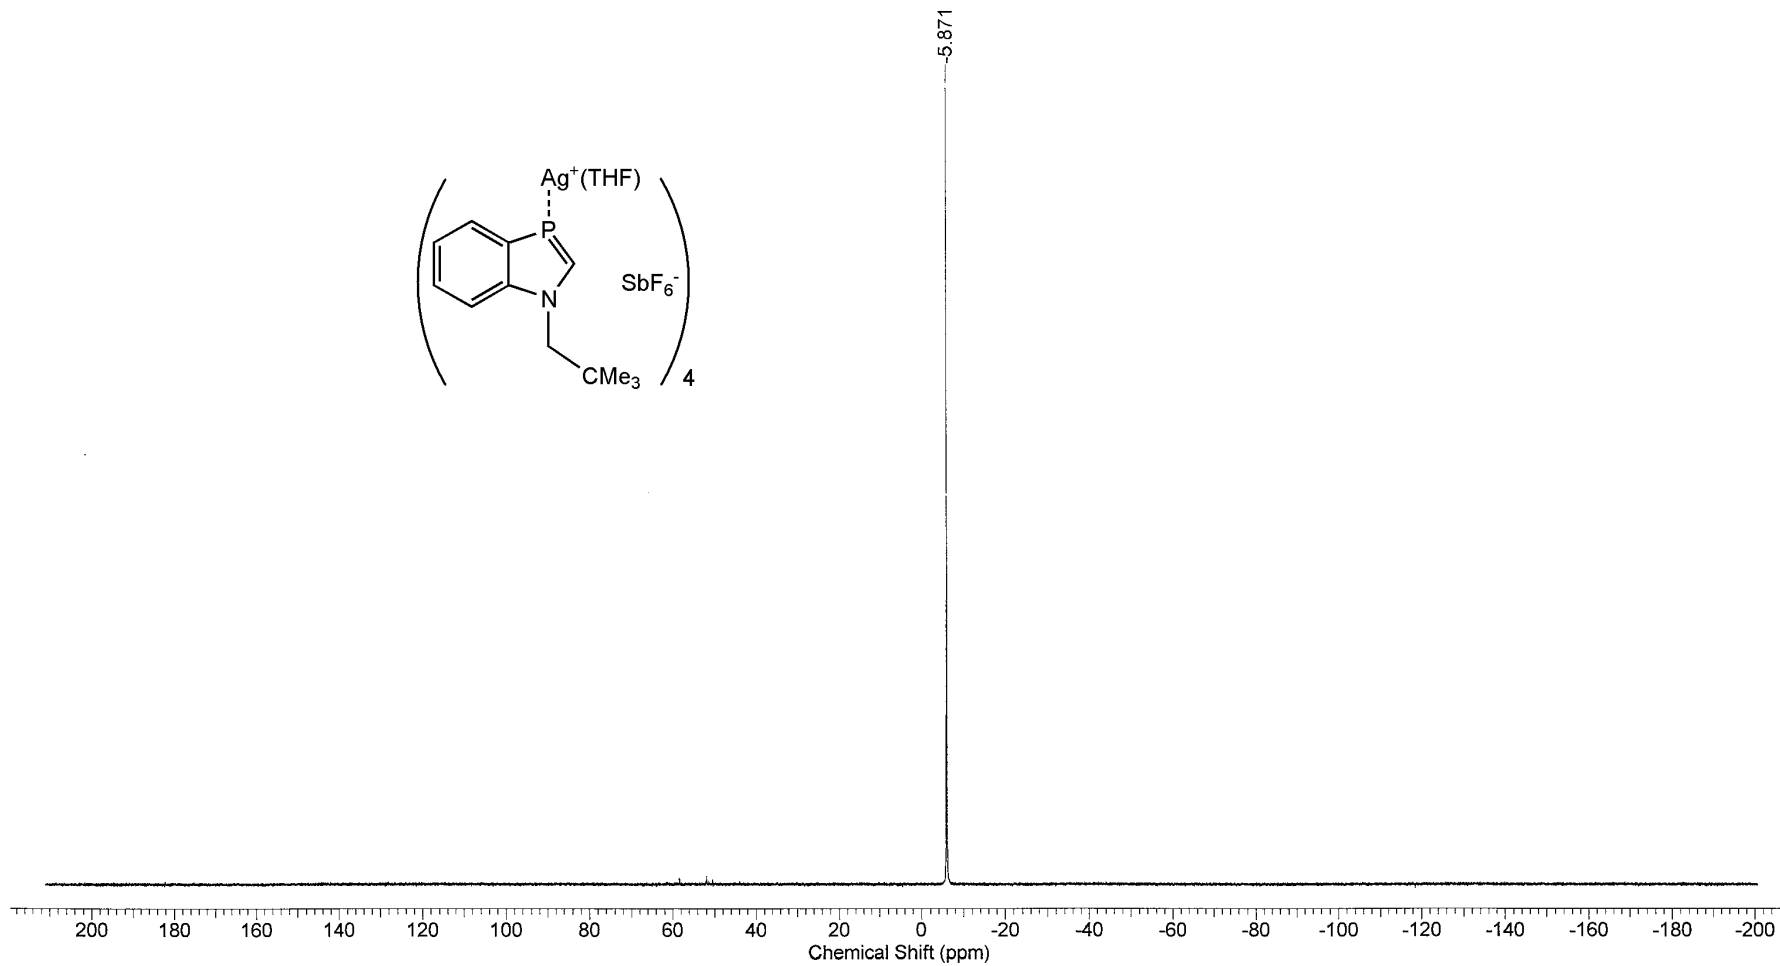

<sup>1</sup>H NMR Spectrum of compound **5** in [D<sub>8</sub>]THF.

|                        |                            |                      |                                                                                                                       |                       |          |
|------------------------|----------------------------|----------------------|-----------------------------------------------------------------------------------------------------------------------|-----------------------|----------|
| Acquisition Time (sec) | 5.2953                     | Comment              | M. Ghalib: MBN77Hgx 1H-Spektrum Loesungsmittel:THF-d8 Referenz: LM = 1,72 ppm Messzeit: 10 min. EMAU, Avance II - 300 |                       |          |
| Date                   | 11 Nov 2011 12:05:36       | Date Stamp           | 11 Nov 2011 12:05:36                                                                                                  |                       |          |
| File Name              | H:\GH_MBN77HGX1\PDATA\1\1R | Frequency (MHz)      | 300.13                                                                                                                | Nucleus               | 1H       |
| Number of Transients   | 32                         | Origin               | spect                                                                                                                 | Original Points Count | 32768    |
| Points Count           | 16384                      | Pulse Sequence       | zg30                                                                                                                  | Receiver Gain         | 90.50    |
| Solvent                | THF                        | Spectrum Offset (Hz) | 1831.9537                                                                                                             | Spectrum Type         | STANDARD |
| Temperature (degree C) | 25.000                     | Sweep Width (Hz)     | 6187.74                                                                                                               |                       |          |

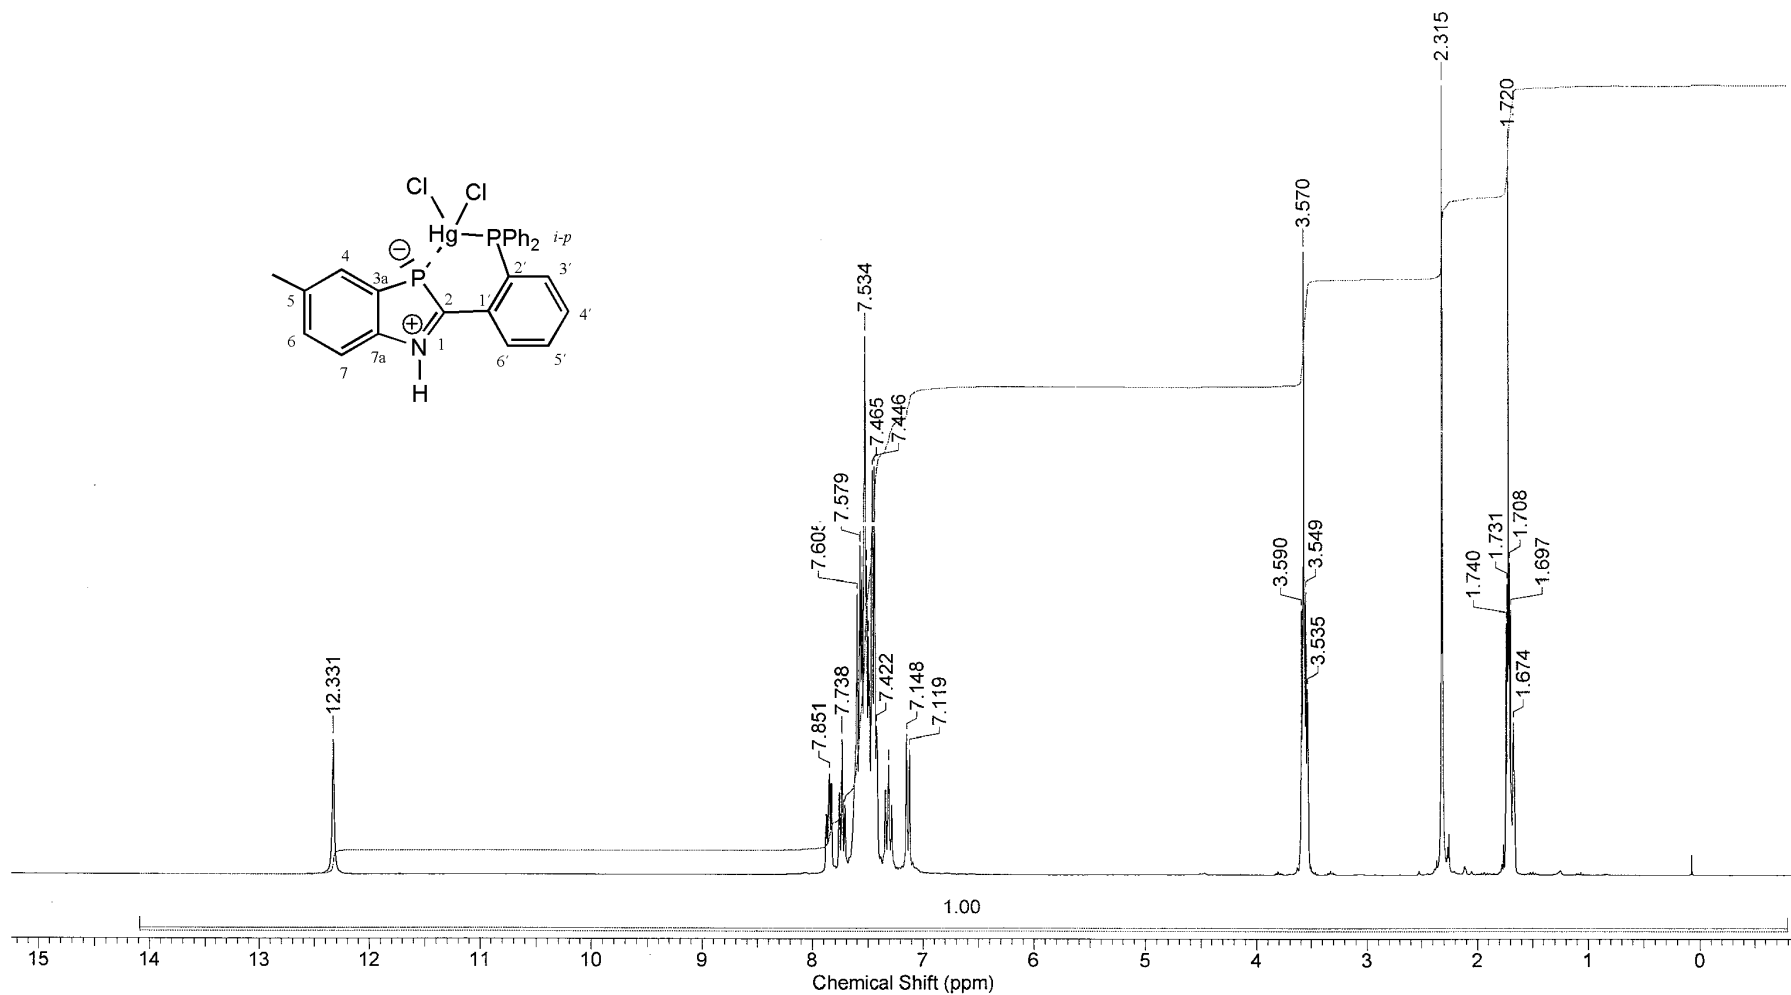

$^{13}\text{C}\{^1\text{H}\}$  NMR Spectrum of compound **5** in  $[\text{D}_8]\text{THF}$ .

|                        |                              |                      |                                                                                                                    |                       |          |
|------------------------|------------------------------|----------------------|--------------------------------------------------------------------------------------------------------------------|-----------------------|----------|
| Acquisition Time (sec) | 0.7537                       | Comment              | M. Ghalib: MBN77HgX 13C{1H}-NMR-Spektrum LM: THF-d8 Referenz: LM = 25.2 Messzeit: 50 Stunden EMAU, AVANCE II - 300 |                       |          |
| Date                   | 14 Nov 2011 09:19:12         | Date Stamp           | 14 Nov 2011 09:19:12                                                                                               |                       |          |
| File Name              | H:\GH_MBN77HGX\13\PDATA\1\1R | Frequency (MHz)      | 75.47                                                                                                              | Nucleus               | 13C      |
| Number of Transients   | 64748                        | Origin               | spect                                                                                                              | Original Points Count | 16384    |
| Points Count           | 16384                        | Pulse Sequence       | zgpg30                                                                                                             | Receiver Gain         | 32800.00 |
| Solvent                | THF-d8                       | Spectrum Offset (Hz) | 8447.3672                                                                                                          | Spectrum Type         | STANDARD |
| Temperature (degree C) | 24.800                       | Sweep Width (Hz)     | 21737.80                                                                                                           |                       |          |

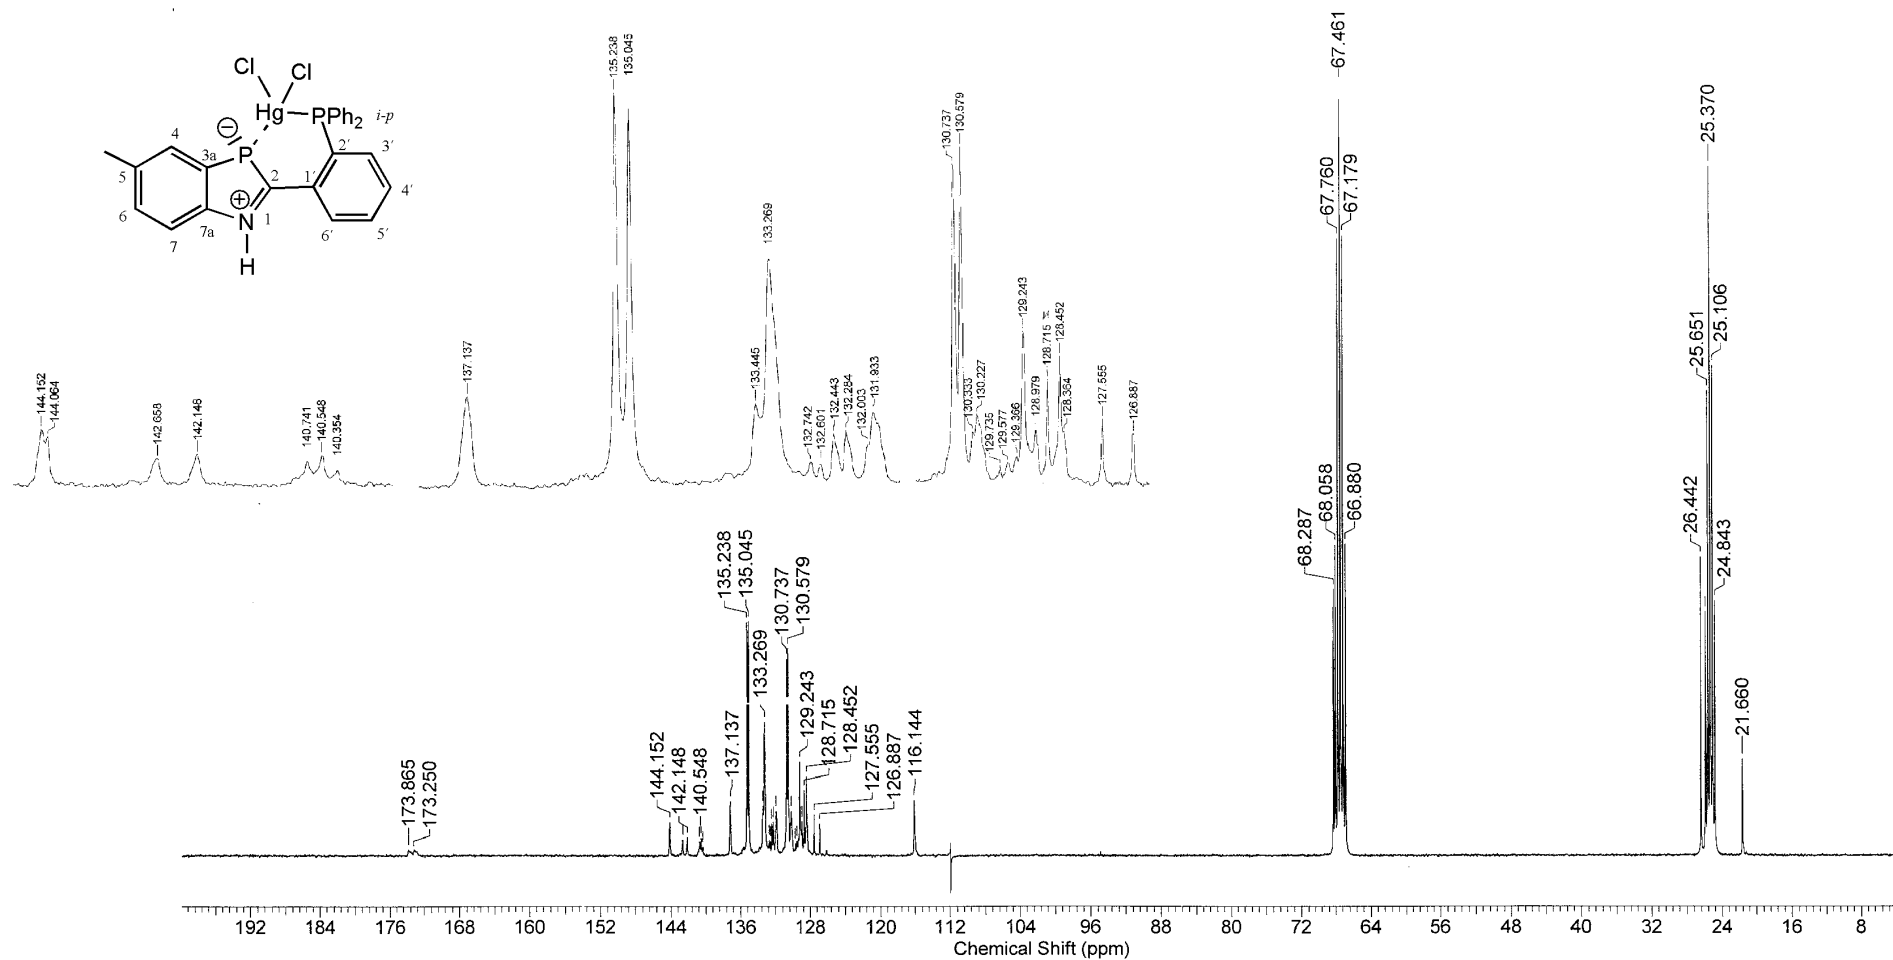

<sup>1</sup>H NMR Spectrum of the HgCl<sub>2</sub> complex with ligand **1** in CD<sub>2</sub>Cl<sub>2</sub> (+trace [D<sub>8</sub>]THF), by elemental analysis roughly (1)·2HgCl<sub>2</sub>.

|                        |                      |                      |                                                                                                                   |                        |               |                      |           |
|------------------------|----------------------|----------------------|-------------------------------------------------------------------------------------------------------------------|------------------------|---------------|----------------------|-----------|
| Acquisition Time (sec) | 5.2953               | Comment              | Ghalib: M129KN1 1H-Spektrum Loesungsmittel: CD2Cl2 Referenz: LM= 5,32 ppm Messzeit: 10 min. EMAU, Avance II - 300 |                        |               |                      |           |
| Date                   | 27 Feb 2012 14:22:08 | Date Stamp           | 27 Feb 2012 14:22:08                                                                                              |                        |               |                      |           |
| File Name              | C:\                  |                      |                                                                                                                   | Frequency (MHz)        | 300.13        |                      |           |
| Nucleus                | 1H                   | Number of Transients | 32                                                                                                                | Origin                 | spect         |                      |           |
| Owner                  | nmr                  | Points Count         | 16384                                                                                                             | Pulse Sequence         | zg30          |                      |           |
| SW(cyclical) (Hz)      | 6188.12              | Solvent              | DICHLOROMETHANE-d2                                                                                                |                        | Receiver Gain | 161.00               |           |
| Spectrum Type          | STANDARD             | Sweep Width (Hz)     | 6187.74                                                                                                           | Temperature (degree C) | 24.700        | Spectrum Offset (Hz) | 1843.8838 |

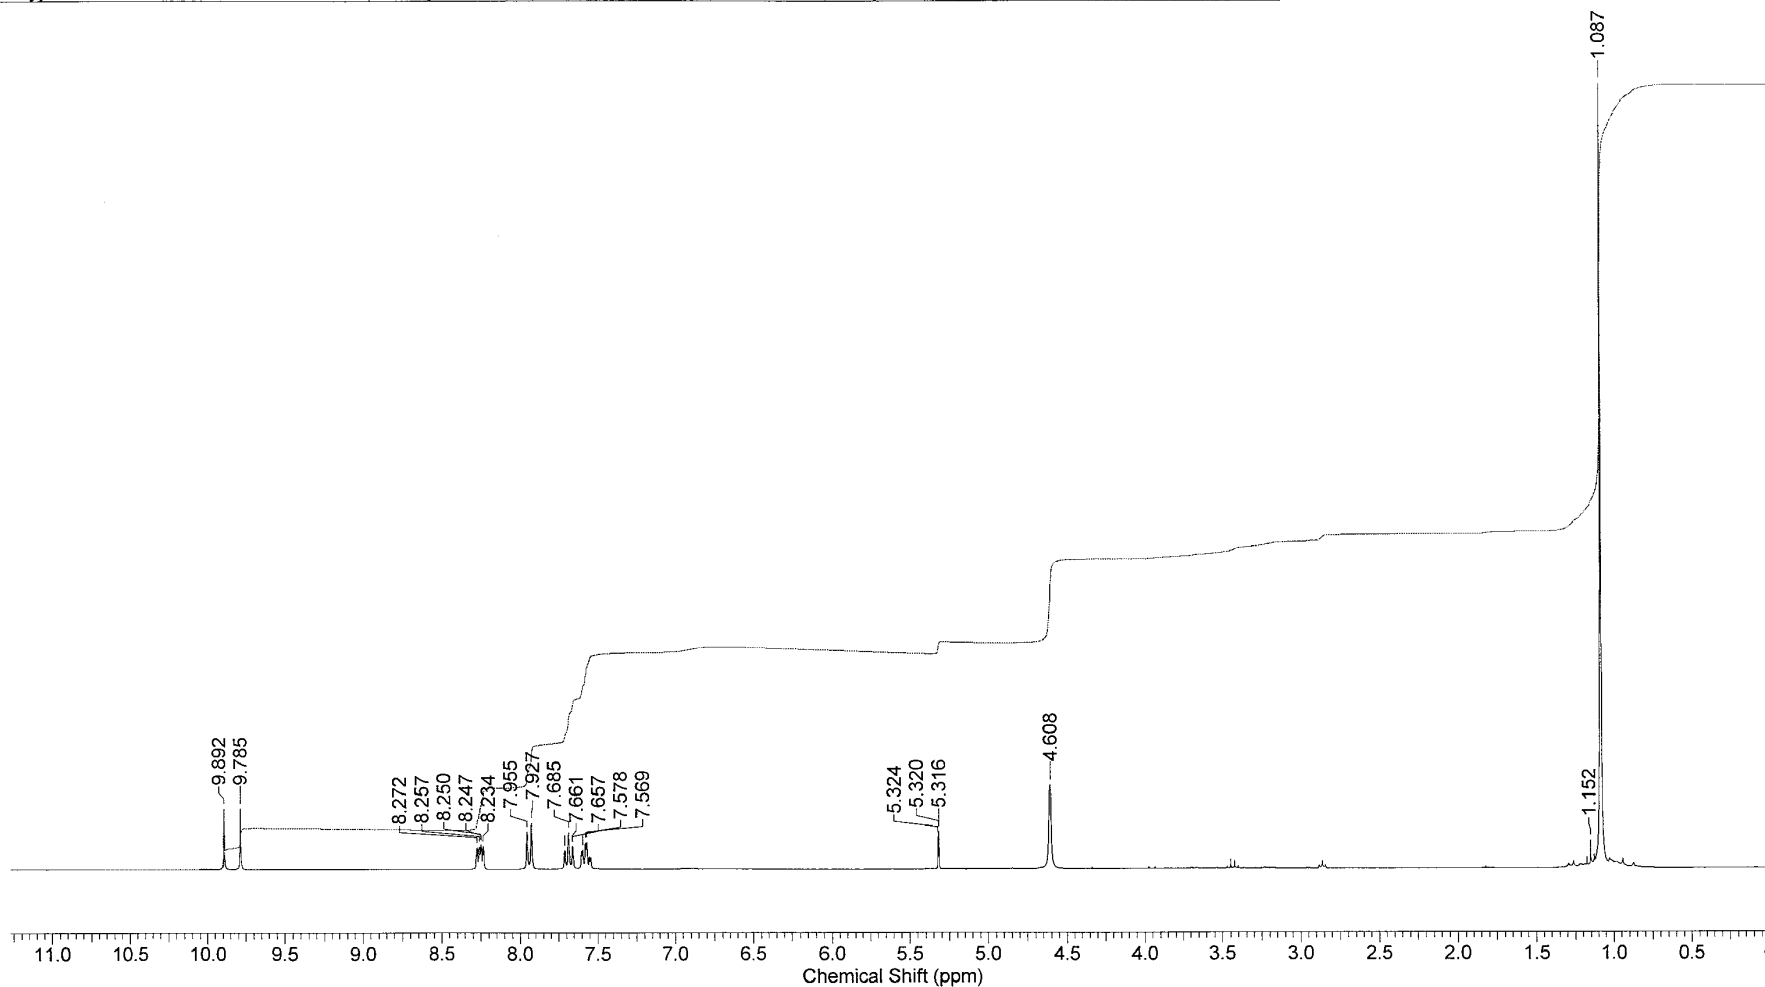

$^{13}\text{C}\{^1\text{H}\}$  NMR Spectrum of the  $\text{HgCl}_2$  complex with ligand **1** in  $\text{CD}_2\text{Cl}_2$  (+trace  $[\text{D}_8]$ THF).

|                        |                      |                      |                                                                                                                    |                        |                      |           |
|------------------------|----------------------|----------------------|--------------------------------------------------------------------------------------------------------------------|------------------------|----------------------|-----------|
| Acquisition Time (sec) | 0.7537               | Comment              | M.Ghalib: M129KN1 13C{1H}-NMR-Spektrum LM: CD2Cl2 Referenz: LM=53,8 ppm Messzeit: 12 Stunden EMAU, AVANCE II - 300 |                        |                      |           |
| Date                   | 28 Feb 2012 09:12:48 | Date Stamp           | 28 Feb 2012 09:12:48                                                                                               |                        |                      |           |
| File Name              | C:\                  |                      |                                                                                                                    | Frequency (MHz)        | 75.47                |           |
| Nucleus                | 13C                  | Number of Transients | 16368                                                                                                              | Origin                 | spect                |           |
| Owner                  | nmr                  | Points Count         | 16384                                                                                                              | Pulse Sequence         | zgpg30               |           |
| SW(cyclical) (Hz)      | 21739.13             | Solvent              | DICHLOROMETHANE-d2                                                                                                 |                        | Spectrum Offset (Hz) | 8395.6455 |
| Spectrum Type          | STANDARD             | Sweep Width (Hz)     | 21737.80                                                                                                           | Temperature (degree C) | 24.600               |           |

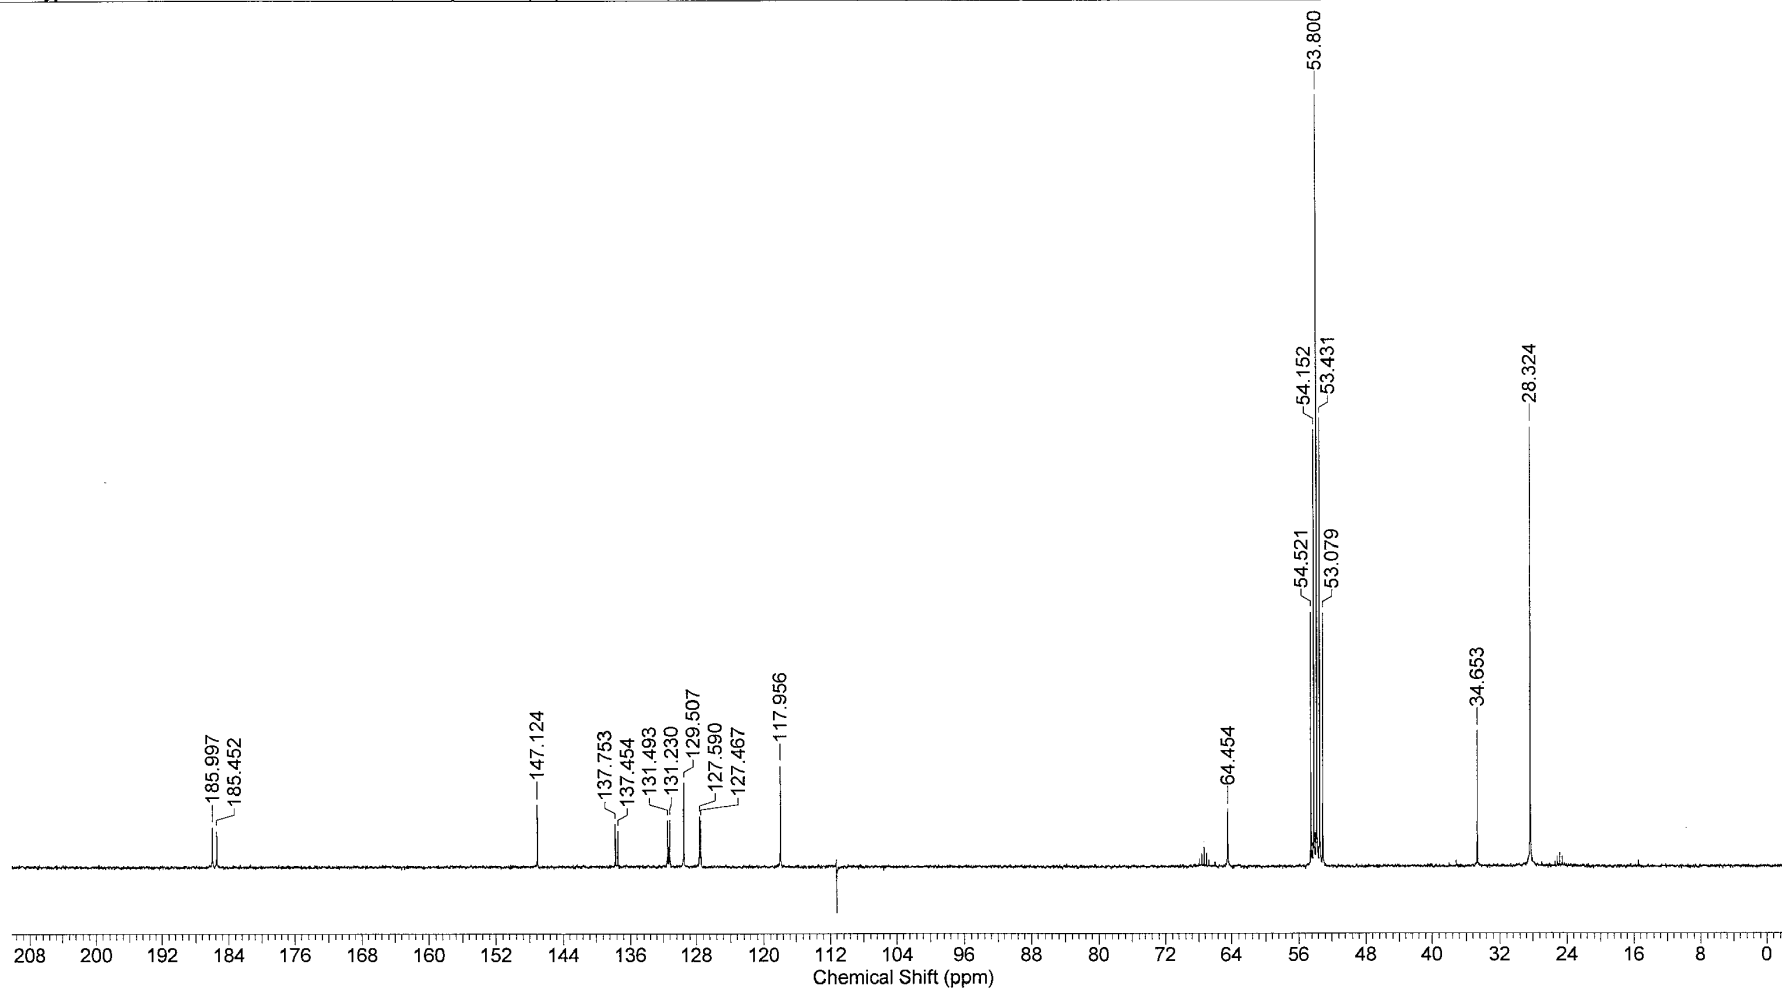



$^{31}\text{P}\{^1\text{H}\}$  NMR Spectrum of the  $\text{HgCl}_2$  complex with ligand **1** in  $\text{CD}_2\text{Cl}_2$  (+trace  $[\text{D}_8]\text{THF}$ ).

|                               |                                                                                                                                                     |                              |                      |                               |          |
|-------------------------------|-----------------------------------------------------------------------------------------------------------------------------------------------------|------------------------------|----------------------|-------------------------------|----------|
| <b>Acquisition Time (sec)</b> | 0.3277                                                                                                                                              |                              |                      |                               |          |
| <b>Comment</b>                | Ghalib: M2ME4MEE 31P(1H)-Spektrum Loesungsmittel: CD2Cl2 Ref.: extern, H3PO4 = 0.0 ppm (+/- 0.3) Messzeit 10 min. EMAU Greifswald - Avance II - 300 |                              |                      |                               |          |
| <b>Date</b>                   | 27 Feb 2012 14:32:48                                                                                                                                | <b>Date Stamp</b>            | 27 Feb 2012 14:32:48 |                               |          |
| <b>File Name</b>              | C:\                                                                                                                                                 |                              |                      |                               |          |
| <b>Frequency (MHz)</b>        | 121.49                                                                                                                                              | <b>Nucleus</b>               | 31P                  | <b>Number of Transients</b>   | 256      |
| <b>Origin</b>                 | spect                                                                                                                                               | <b>Original Points Count</b> | 16384                | <b>Owner</b>                  | nmr      |
| <b>Points Count</b>           | 32768                                                                                                                                               | <b>Pulse Sequence</b>        | zgpg30               | <b>Receiver Gain</b>          | 23100.00 |
| <b>SW(cyclical) (Hz)</b>      | 50000.00                                                                                                                                            | <b>Solvent</b>               | DICHLOROMETHANE-d2   | <b>Spectrum Offset (Hz)</b>   | 499.9960 |
| <b>Spectrum Type</b>          | STANDARD                                                                                                                                            | <b>Sweep Width (Hz)</b>      | 49998.47             | <b>Temperature (degree C)</b> | 24.900   |

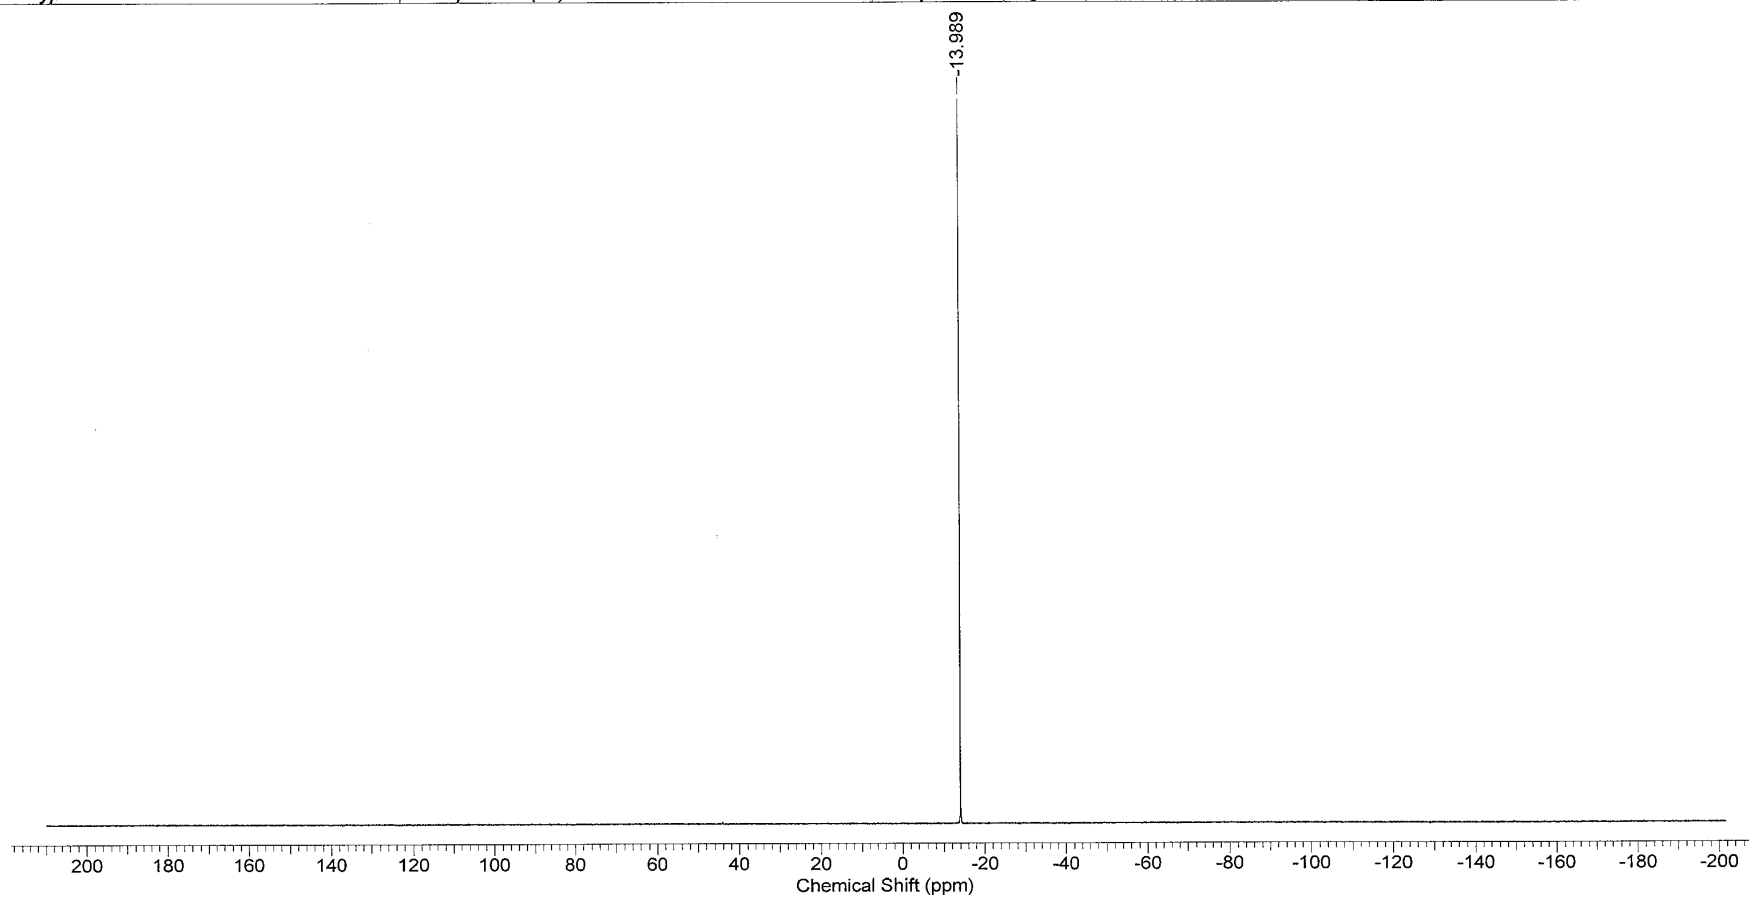

### 3. Background and detailed data of quantum chemical calculations

**3.1. Program:** Gaussian 09, Revision B.01, M. J. Frisch, G. W. Trucks, H. B. Schlegel, G. E. Scuseria, M. A. Robb, J. R. Cheeseman, G. Scalmani, V. Barone, B. Mennucci, G. A. Petersson, H. Nakatsuji, M. Caricato, X. Li, H. P. Hratchian, A. F. Izmaylov, J. Bloino, G. Zheng, J. L. Sonnenberg, M. Hada, M. Ehara, K. Toyota, R. Fukuda, J. Hasegawa, M. Ishida, T. Nakajima, Y. Honda, O. Kitao, H. Nakai, T. Vreven, J. A. Montgomery, Jr., J. E. Peralta, F. Ogliaro, M. Bearpark, J. J. Heyd, E. Brothers, K. N. Kudin, V. N. Staroverov, T. Keith, R. Kobayashi, J. Normand, K. Raghavachari, A. Rendell, J. C. Burant, S. S. Iyengar, J. Tomasi, M. Cossi, N. Rega, J. M. Millam, M. Klene, J. E. Knox, J. B. Cross, V. Bakken, C. Adamo, J. Jaramillo, R. Gomperts, R. E. Stratmann, O. Yazyev, A. J. Austin, R. Cammi, C. Pomelli, J. W. Ochterski, R. L. Martin, K. Morokuma, V. G. Zakrzewski, G. A. Voth, P. Salvador, J. J. Dannenberg, S. Dapprich, A. D. Daniels, O. Farkas, J. B. Foresman, J. V. Ortiz, J. Cioslowski, D. J. Fox, Gaussian, Inc., Wallingford CT, 2010.

**3.2. Geometry optimization** of **5** and the  $L(\text{PMe}_3)\text{HgCl}_2$  systems were followed by calculation of the second derivatives to ensure that real minima were obtained. In the second order perturbation treatment in the NBO analysis the interaction with  $\text{Ag}^+$  and  $\text{Hg}^{2+}$  was considered. In Figure 3 the Kohn-Sham orbital was plotted by the VMD program (VMD - Visual Molecular Dynamics. W. Humphrey, A. Dalke, K. Schulten. *Journal of Molecular Graphics*, **1996**, *14*, 33-38.), while for the structures the MOLDEN program has been used (G.Schaftenaar, J. H. Noordik, *J. Comput.-Aided Mol. Des.* **2000**, *14*, 123–134.).

**3.3. Figures:** Figure S3.3: Optimized structure of **5** at the  $\omega\text{B97X-D/6-31G}^*$  level (on the transition metal Def2-TZVPP basis set was used).

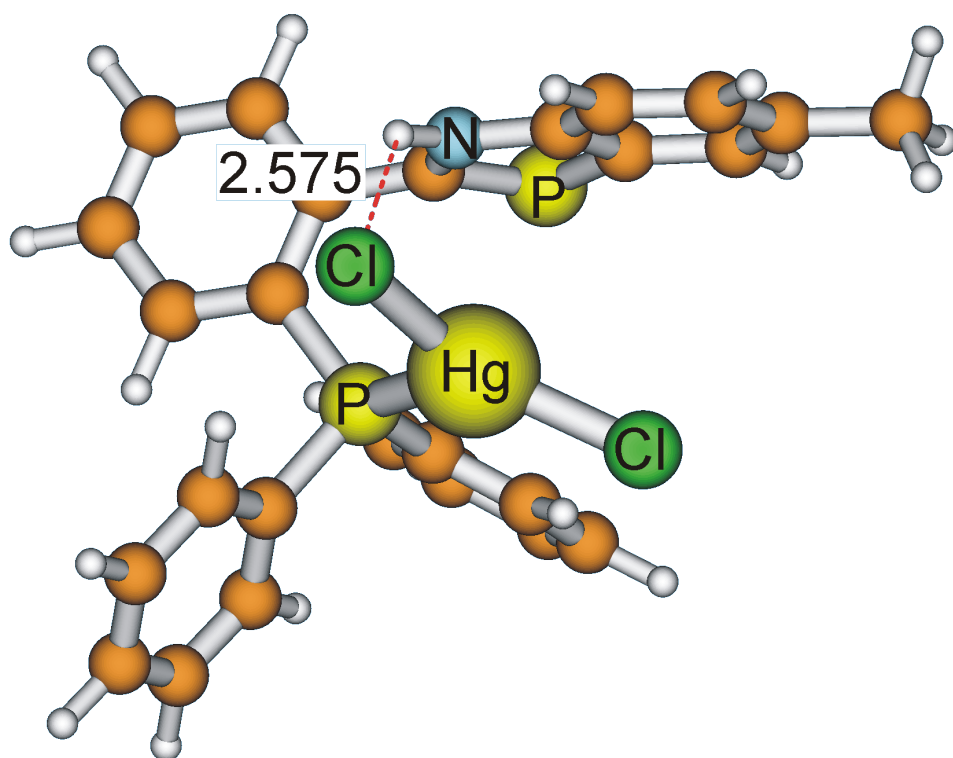

**Figure S3.4** The  $\omega$ B97D/6-31G\* optimized structures of  $L(\text{PMe}_3)_2\text{HgCl}_2$  complexes. (on the transition metal Def2-TZVPP basis set was used)

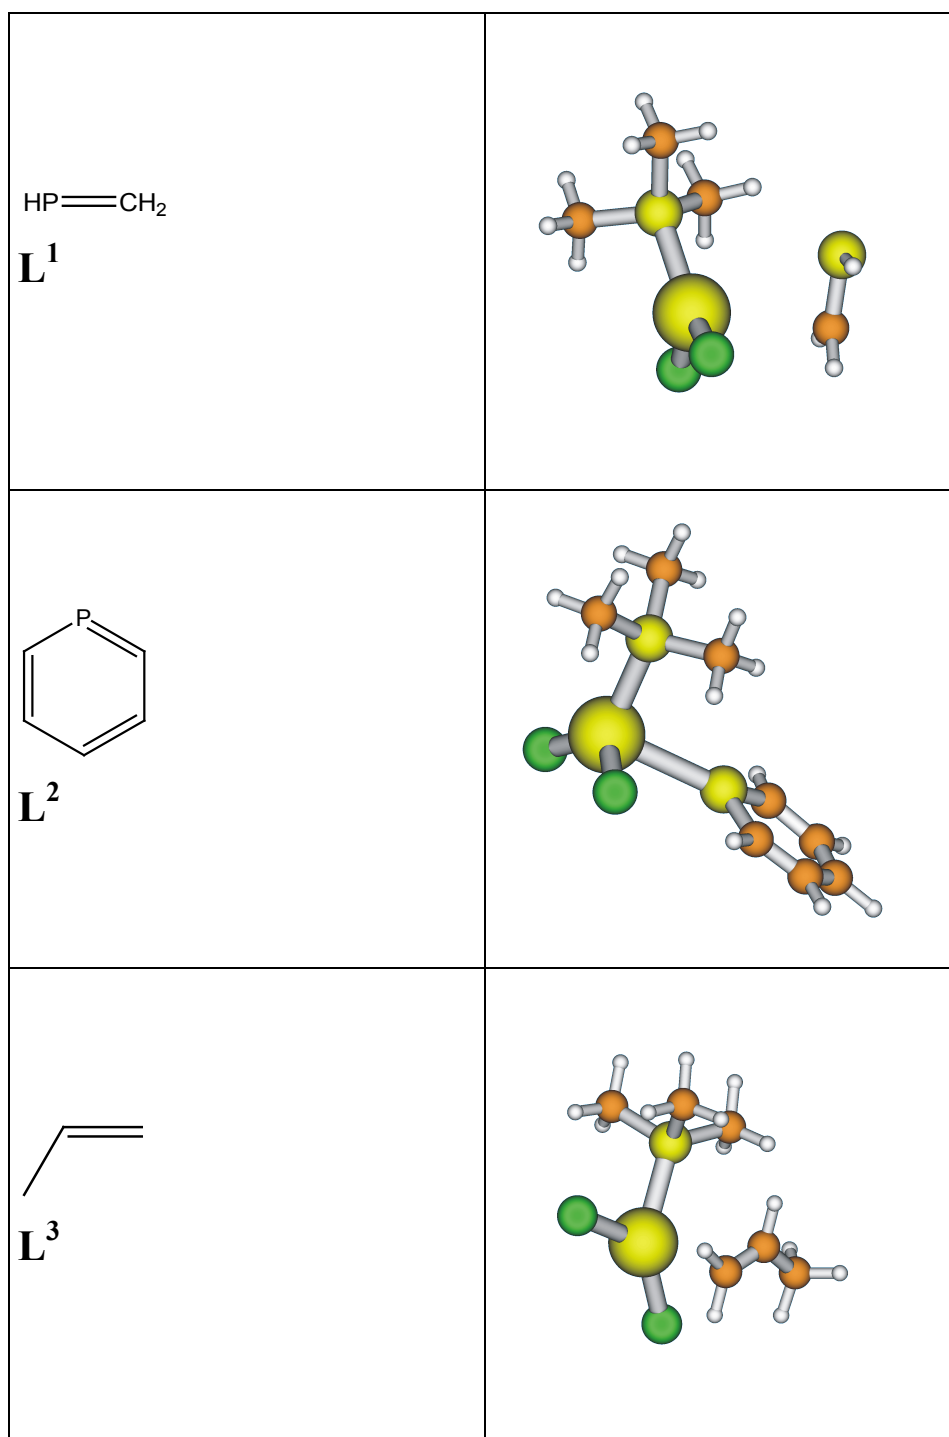

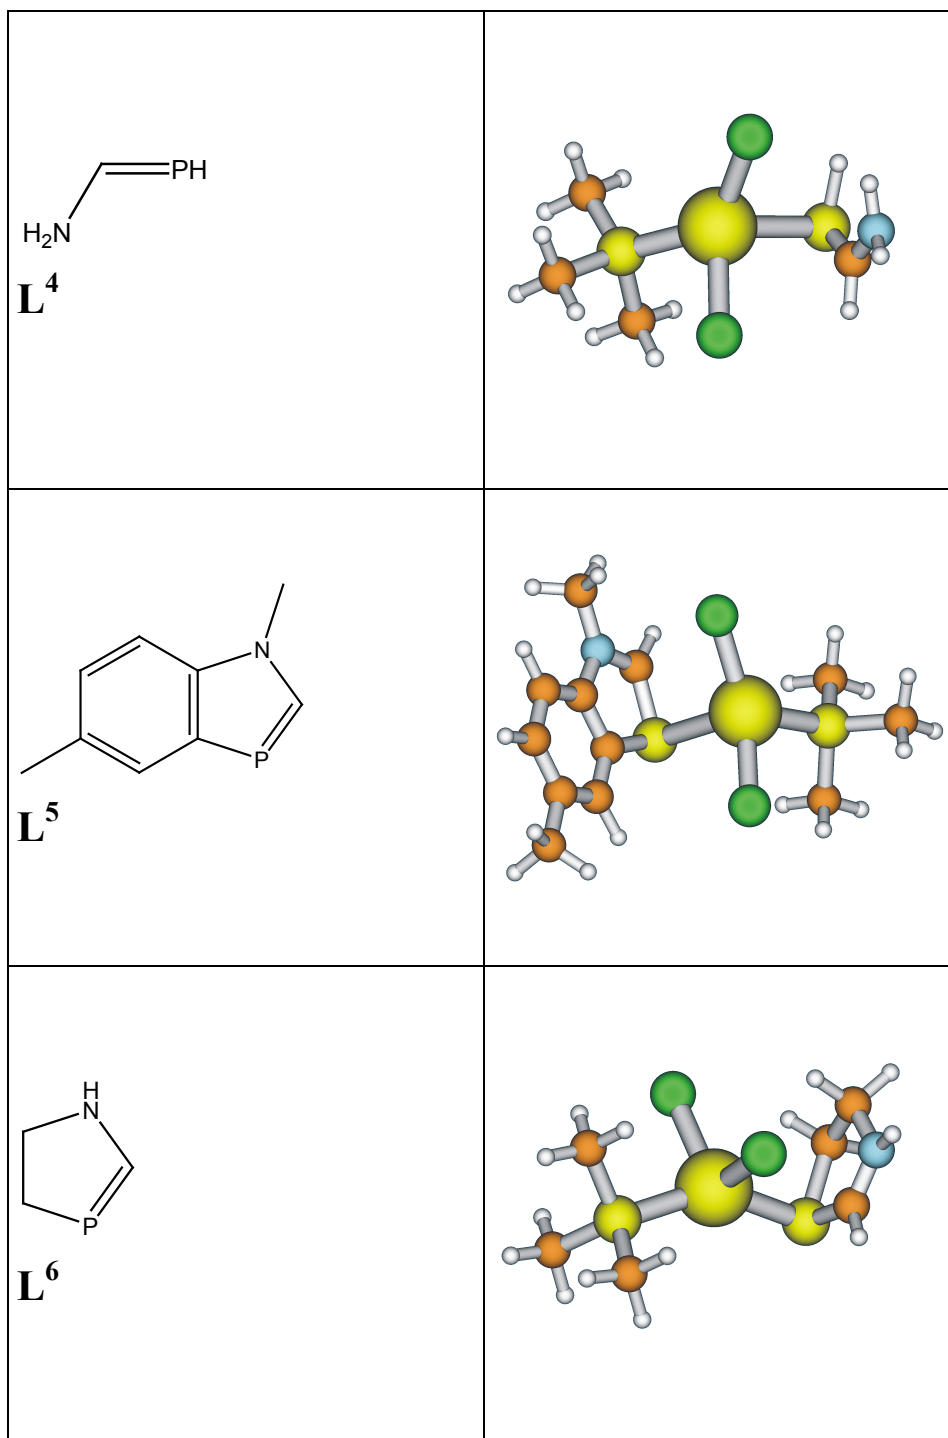

**3.4.** Energies and optimized geometries of **L<sup>n</sup>(PMe<sub>3</sub>)HgCl<sub>2</sub>** at the  $\omega$ B97X-D/6-31G\* level  
(on the transition metal Def2-TZVPP basis set was used)

**L<sup>1</sup>(PMe<sub>3</sub>)HgCl<sub>2</sub>** ( $\omega$ B97Xd/6-31G\*,def2-TZVPP on the Hg): *ENERGY* = -1916.2273306

|    |          |          |           |
|----|----------|----------|-----------|
| C  | 3.284268 | 0.431008 | 1.050195  |
| P  | 3.355704 | 1.919836 | -0.006073 |
| C  | 1.966930 | 1.721592 | -1.172769 |
| Hg | 5.526272 | 1.928711 | -1.259142 |

|    |          |           |           |
|----|----------|-----------|-----------|
| Cl | 4.957927 | -0.210015 | -2.413068 |
| C  | 2.899203 | 3.324112  | 1.071989  |
| P  | 4.059525 | 4.347563  | -3.304181 |
| C  | 4.879599 | 3.107392  | -4.066392 |
| H  | 5.939413 | 3.130938  | -4.308582 |
| Cl | 7.588177 | 3.091249  | -1.272937 |
| H  | 1.033846 | 1.525392  | -0.634900 |
| H  | 2.197996 | 0.882640  | -1.836040 |
| H  | 1.858248 | 2.628107  | -1.774757 |
| H  | 3.666055 | 3.465747  | 1.838342  |
| H  | 2.837394 | 4.236045  | 0.471498  |
| H  | 1.933138 | 3.145484  | 1.555257  |
| H  | 4.033860 | 0.496548  | 1.843625  |
| H  | 2.291389 | 0.315561  | 1.496421  |
| H  | 3.511255 | -0.438905 | 0.426358  |
| H  | 4.353405 | 2.200777  | -4.357669 |
| H  | 5.156668 | 5.232714  | -3.123144 |

**L<sup>2</sup>(PMe<sub>3</sub>)HgCl<sub>2</sub>** (*ω*B97Xd/6-31G\*,def2-TZVPP on the Hg): *ENERGY* = -2069.8319781

|    |           |           |          |
|----|-----------|-----------|----------|
| C  | -0.059892 | -0.126329 | 2.544881 |
| C  | -0.620646 | -1.228555 | 3.189917 |
| C  | -1.934259 | -1.253557 | 3.658005 |
| C  | -2.811024 | -0.183215 | 3.528243 |
| P  | -2.395204 | 1.313228  | 2.776792 |
| C  | -0.752566 | 1.055371  | 2.308095 |
| Hg | -4.656551 | 3.137488  | 2.294412 |
| Cl | -4.302412 | 3.778304  | 0.029657 |
| Cl | -6.166766 | 1.447803  | 3.357811 |
| P  | -4.508810 | 4.454530  | 4.460900 |
| C  | -4.004331 | 3.341989  | 5.820063 |
| C  | -3.423600 | 5.921384  | 4.609030 |
| H  | -3.494087 | 6.365021  | 5.607612 |
| H  | -3.711727 | 6.666392  | 3.862276 |
| H  | -2.387458 | 5.628218  | 4.418074 |
| C  | -6.174413 | 5.031380  | 4.944671 |
| H  | -6.171400 | 5.455422  | 5.953942 |

|   |           |           |          |
|---|-----------|-----------|----------|
| H | -6.525058 | 5.785980  | 4.235155 |
| H | -6.855488 | 4.175887  | 4.905319 |
| H | -4.080620 | 3.841792  | 6.791022 |
| H | -4.660397 | 2.466487  | 5.798544 |
| H | -2.975490 | 3.006089  | 5.661336 |
| H | -3.831500 | -0.274578 | 3.893938 |
| H | -2.290430 | -2.160437 | 4.141061 |
| H | -0.006017 | -2.113446 | 3.327899 |
| H | 0.970906  | -0.199872 | 2.205947 |
| H | -0.243700 | 1.863296  | 1.788512 |

$L^3(PMe_3)HgCl_2$  ( $\omega B97Xd/6-31G^*, def2-TZVPP$  on the Hg): ENERGY = -1653.0148325

|    |           |           |           |
|----|-----------|-----------|-----------|
| C  | -3.134582 | -0.786382 | 1.619965  |
| P  | -2.134787 | 0.385145  | 0.636266  |
| C  | -3.045885 | 0.596611  | -0.937961 |
| C  | -0.636485 | -0.568055 | 0.195731  |
| Hg | -1.486949 | 2.393148  | 2.074810  |
| Cl | -1.176301 | 4.650684  | 1.402733  |
| C  | -4.673856 | 2.804997  | 2.276321  |
| C  | -4.071066 | 3.002992  | 3.453903  |
| Cl | -0.824172 | 1.019209  | 3.998692  |
| C  | -4.838360 | 3.839450  | 1.203297  |
| H  | -3.255734 | -1.741346 | 1.098771  |
| H  | -2.629806 | -0.943527 | 2.577958  |
| H  | -4.119417 | -0.354841 | 1.817806  |
| H  | -3.220022 | -0.367937 | -1.426121 |
| H  | -4.008538 | 1.077400  | -0.741233 |
| H  | -2.471595 | 1.242186  | -1.608202 |
| H  | -0.896292 | -1.504813 | -0.307762 |
| H  | 0.004348  | 0.029518  | -0.458649 |
| H  | -0.084858 | -0.788289 | 1.114623  |
| H  | -3.996385 | 2.217252  | 4.200056  |
| H  | -3.650491 | 3.972091  | 3.715075  |
| H  | -4.345884 | 4.776618  | 1.474001  |
| H  | -4.401039 | 3.498709  | 0.256464  |
| H  | -5.901458 | 4.034762  | 1.017533  |

H -5.110688 1.825497 2.073135

**L<sup>4</sup>(PMe<sub>3</sub>)HgCl<sub>2</sub>** (*ω*B97Xd/6-31G\*,def2-TZVPP on the Hg): ENERGY = -1971.5918143

|    |           |           |           |
|----|-----------|-----------|-----------|
| C  | 3.213918  | 0.280688  | 0.721134  |
| P  | 3.916607  | 1.817719  | 0.030246  |
| Hg | 2.233711  | 2.965347  | -1.402763 |
| P  | 2.857598  | 5.646128  | -1.843428 |
| Cl | 1.373472  | 2.569946  | -3.665153 |
| Cl | 0.508371  | 3.073021  | 0.480222  |
| C  | 5.551922  | 1.357675  | -0.647848 |
| C  | 4.259572  | 2.869702  | 1.481846  |
| H  | 4.904970  | 2.355892  | 2.201319  |
| H  | 3.302226  | 3.118417  | 1.949918  |
| H  | 4.737206  | 3.798590  | 1.157748  |
| H  | 5.417438  | 0.665985  | -1.484068 |
| H  | 6.056311  | 2.253248  | -1.021174 |
| H  | 6.177009  | 0.884205  | 0.116242  |
| H  | 3.057024  | -0.445207 | -0.081456 |
| H  | 3.875460  | -0.149625 | 1.479817  |
| H  | 2.243260  | 0.521728  | 1.165164  |
| C  | 1.119702  | 5.691700  | -1.701001 |
| H  | 0.719626  | 5.841202  | -0.699286 |
| N  | 0.194286  | 5.552242  | -2.642005 |
| H  | -0.766041 | 5.395948  | -2.366831 |
| H  | 0.460541  | 5.154852  | -3.537333 |
| H  | 2.884577  | 5.432762  | -3.248939 |

**L<sup>5</sup>(PMe<sub>3</sub>)HgCl<sub>2</sub>** (*ω*B97Xd/6-31G\*,def2-TZVPP on the Hg): ENERGY = -2279.991627

|   |          |           |           |
|---|----------|-----------|-----------|
| C | 5.778836 | 0.845632  | -0.518428 |
| C | 5.618255 | -0.304120 | 0.282311  |
| C | 4.460177 | -0.447048 | 1.030188  |
| C | 3.459577 | 0.533550  | 0.985698  |
| C | 3.646277 | 1.659781  | 0.165180  |
| C | 4.811125 | 1.828859  | -0.591069 |
| C | 6.689236 | -1.366007 | 0.317998  |
| P | 1.844260 | 0.570324  | 1.777004  |



|    |           |           |           |
|----|-----------|-----------|-----------|
| Hg | 0.913441  | -0.873968 | -0.667539 |
| P  | -1.279785 | -1.587129 | 0.448975  |
| C  | -2.311340 | -2.709061 | -0.564992 |
| N  | 2.548998  | 2.511394  | 0.178319  |
| C  | 2.461762  | 3.671092  | -0.693481 |
| C  | 1.543836  | 2.066627  | 0.948048  |
| Cl | 2.188162  | -2.947978 | -0.371553 |
| Cl | 0.958550  | 0.860437  | -2.359571 |
| C  | -0.877691 | -2.552936 | 1.946524  |
| C  | -2.426801 | -0.278387 | 1.019109  |
| H  | 4.946361  | 2.691479  | -1.235342 |
| H  | 6.683843  | 0.951548  | -1.110620 |
| H  | 7.312547  | -1.332576 | -0.580852 |
| H  | 6.246464  | -2.364550 | 0.384051  |
| H  | 7.349083  | -1.234970 | 1.184432  |
| H  | 4.306085  | -1.345173 | 1.621447  |
| H  | -1.776559 | -2.958822 | 2.421720  |
| H  | -0.202337 | -3.364867 | 1.660168  |
| H  | -0.345516 | -1.908427 | 2.652185  |
| H  | -3.184392 | -3.063243 | -0.007019 |
| H  | -2.643692 | -2.187388 | -1.466829 |
| H  | -1.704059 | -3.566724 | -0.868515 |
| H  | -3.299433 | -0.704626 | 1.524724  |
| H  | -1.897030 | 0.381306  | 1.712534  |
| H  | -2.757495 | 0.315802  | 0.162657  |
| H  | 0.634930  | 2.656140  | 0.974659  |
| H  | 1.528492  | 4.196894  | -0.491859 |
| H  | 3.303052  | 4.343843  | -0.504536 |
| H  | 2.464766  | 3.342094  | -1.735913 |

**L<sup>6</sup>(PMe<sub>3</sub>)HgCl<sub>2</sub>** (*ω*B97Xd/6-31G\*,def2-TZVPP on the Hg): ENERGY = -2048.9985219

|   |          |          |           |
|---|----------|----------|-----------|
| C | 3.814508 | 0.618354 | 0.651013  |
| P | 2.930408 | 2.092444 | 0.042184  |
| C | 1.246926 | 1.509537 | -0.359935 |
| C | 2.759134 | 3.190086 | 1.495190  |

|    |          |           |           |
|----|----------|-----------|-----------|
| Hg | 4.271739 | 2.906926  | -1.896879 |
| Cl | 6.585085 | 2.929596  | -0.850861 |
| Cl | 3.802165 | 0.600722  | -3.136357 |
| P  | 4.523387 | 4.646475  | -3.770885 |
| C  | 4.168610 | 3.295179  | -4.854065 |
| N  | 5.198533 | 2.652373  | -5.349834 |
| C  | 6.495867 | 2.983986  | -4.739942 |
| C  | 6.354325 | 4.390545  | -4.152196 |
| H  | 0.614718 | 2.355941  | -0.642450 |
| H  | 1.326364 | 0.829997  | -1.214050 |
| H  | 0.795330 | 0.986126  | 0.488996  |
| H  | 3.755453 | 3.523317  | 1.799863  |
| H  | 2.280215 | 2.667868  | 2.329841  |
| H  | 2.164601 | 4.068913  | 1.230517  |
| H  | 4.832361 | 0.907753  | 0.928112  |
| H  | 3.300097 | 0.169806  | 1.507019  |
| H  | 3.877417 | -0.099928 | -0.172063 |
| H  | 5.061284 | 1.732004  | -5.751846 |
| H  | 6.953859 | 4.486575  | -3.244022 |
| H  | 7.284715 | 2.916339  | -5.492372 |
| H  | 3.176899 | 2.929381  | -5.101018 |
| H  | 6.661774 | 5.157564  | -4.870058 |
| H  | 6.682957 | 2.245177  | -3.949237 |

#### 4. Details of crystal structure determination of **2** and **5** and data tables

Intensity data were registered on an Oxford Diffraction Xcalibur diffractometer at 100 K using monochromated Mo  $K\alpha$  radiation. Absorption corrections were based on multi-scans. Structures were refined anisotropically on  $F^2$  using the program SHELXL-97 (G. M. Sheldrick, University of Göttingen, Germany). NH hydrogens were refined freely, methyls as rigid groups allowed to rotate but not tip, other H using a riding model starting from calculated positions.

Crystallographic data for **2** and **5** have been deposited with the Cambridge Crystallographic Data Centre, CCDC 926714 and 926715. Copies of the data can be obtained, free of charge, on application to CCDC, 12 Union Road, Cambridge CB2 1EZ, UK, (fax: +44-(0)1223-336033 or e-mail: [deposit@ccdc.cam.ac.uk](mailto:deposit@ccdc.cam.ac.uk)).

Table 1. Crystal data and structure refinement for compound **2**.

|                                   |                                             |                             |
|-----------------------------------|---------------------------------------------|-----------------------------|
| Identification code               | agriw                                       |                             |
| Empirical formula                 | $C_{48}H_{64}Ag_2Cl_2N_4P_4$                |                             |
| Formula weight                    | 1107.55                                     |                             |
| Temperature                       | 100(2) K                                    |                             |
| Wavelength                        | 0.71073 Å                                   |                             |
| Crystal system                    | Triclinic                                   |                             |
| Space group                       | P(-1)                                       |                             |
| Unit cell dimensions              | a = 8.8284(2) Å                             | $\alpha = 107.197(2)^\circ$ |
|                                   | b = 9.9359(2) Å                             | $\beta = 105.744(2)^\circ$  |
|                                   | c = 15.5614(3) Å                            | $\gamma = 90.499(2)^\circ$  |
| Volume                            | 1249.18(4) Å <sup>3</sup>                   |                             |
| Z                                 | 1                                           |                             |
| Density (calculated)              | 1.472 Mg/m <sup>3</sup>                     |                             |
| Absorption coefficient            | 1.056 mm <sup>-1</sup>                      |                             |
| F(000)                            | 568                                         |                             |
| Crystal size                      | 0.45 x 0.25 x 0.08 mm <sup>3</sup>          |                             |
| Theta range for data collection   | 2.41 to 30.03°                              |                             |
| Index ranges                      | -12 ≤ h ≤ 12, -13 ≤ k ≤ 13, -21 ≤ l ≤ 21    |                             |
| Reflections collected             | 81562                                       |                             |
| Independent reflections           | 7153 [R(int) = 0.0261]                      |                             |
| Completeness to theta = 30.03°    | 97.9 %                                      |                             |
| Absorption correction             | Semi-empirical from equivalents             |                             |
| Max. and min. transmission        | 1.00000 and 0.85071                         |                             |
| Refinement method                 | Full-matrix least-squares on F <sup>2</sup> |                             |
| Data / restraints / parameters    | 7153 / 0 / 277                              |                             |
| Goodness-of-fit on F <sup>2</sup> | 1.069                                       |                             |
| Final R indices [I > 2σ(I)]       | R1 = 0.0171, wR2 = 0.0428                   |                             |
| R indices (all data)              | R1 = 0.0194, wR2 = 0.0442                   |                             |
| Largest diff. peak and hole       | 0.435 and -0.260 e.Å <sup>-3</sup>          |                             |

Table 2. Atomic coordinates ( $\times 10^4$ ) and equivalent isotropic displacement parameters ( $\text{\AA}^2 \times 10^3$ ) for compound **2**.  $U(\text{eq})$  is defined as one third of the trace of the orthogonalized  $U_{ij}$  tensor.

|        | x           | y           | z         | $U(\text{eq})$ |
|--------|-------------|-------------|-----------|----------------|
| Ag     | 1738.6(1)   | 796.0(1)    | 5016.1(1) | 18.1(1)        |
| Cl     | -1233.6(3)  | 1167.9(3)   | 4299.4(2) | 18.2(1)        |
| N(1)   | 6676.0(10)  | 3439.9(9)   | 6671.4(6) | 14.4(2)        |
| C(2)   | 5411.7(13)  | 2986.3(11)  | 5899.3(7) | 16.5(2)        |
| P(3)   | 3642.1(3)   | 2774.6(3)   | 6120.6(2) | 18.1(1)        |
| C(3A)  | 4651.5(13)  | 3233.6(11)  | 7332.8(8) | 16.6(2)        |
| C(4)   | 4066.4(15)  | 3304.1(12)  | 8099.5(9) | 22.9(2)        |
| C(5)   | 5090.6(17)  | 3701.2(13)  | 8994.4(9) | 27.1(3)        |
| C(6)   | 6703.8(17)  | 4054.4(13)  | 9147.9(8) | 25.5(2)        |
| C(7)   | 7317.9(14)  | 4003.9(12)  | 8412.2(8) | 20.2(2)        |
| C(7A)  | 6281.4(13)  | 3583.4(11)  | 7499.3(7) | 15.2(2)        |
| C(8)   | 8282.8(12)  | 3666.9(11)  | 6604.0(8) | 15.9(2)        |
| C(9)   | 8727.9(12)  | 5139.1(11)  | 6556.6(8) | 17.0(2)        |
| C(10)  | 10365.3(14) | 5089.5(14)  | 6396.7(9) | 25.2(2)        |
| C(11)  | 8780.5(14)  | 6295.0(12)  | 7471.7(9) | 21.6(2)        |
| C(12)  | 7557.8(14)  | 5458.0(13)  | 5728.9(9) | 23.0(2)        |
| N(1')  | 4016.3(10)  | 38.3(9)     | 2329.2(6) | 14.2(2)        |
| C(2')  | 4244.2(12)  | 336.0(11)   | 3269.8(7) | 15.2(2)        |
| P(3')  | 2588.2(3)   | 14.5(3)     | 3572.1(2) | 16.8(1)        |
| C(3A') | 1492.0(12)  | -552.7(11)  | 2374.5(8) | 16.3(2)        |
| C(4')  | -103.9(13)  | -1096.4(13) | 1948.8(9) | 22.5(2)        |
| C(5')  | -676.2(14)  | -1566.7(14) | 986.6(10) | 27.4(3)        |
| C(6')  | 309.4(15)   | -1491.2(13) | 426.1(9)  | 26.4(3)        |
| C(7')  | 1878.1(14)  | -949.8(12)  | 822.6(8)  | 21.0(2)        |
| C(7A') | 2473.6(12)  | -482.5(11)  | 1804.9(7) | 15.4(2)        |
| C(8')  | 5322.8(12)  | 248.5(11)   | 1950.1(7) | 15.3(2)        |
| C(9')  | 5560.7(12)  | 1737.3(11)  | 1860.0(7) | 15.5(2)        |
| C(10') | 7120.9(14)  | 1788.5(13)  | 1610.2(9) | 23.9(2)        |
| C(11') | 4212.5(15)  | 1985.4(13)  | 1082.3(8) | 22.6(2)        |
| C(12') | 5694.1(13)  | 2884.2(11)  | 2792.6(8) | 17.7(2)        |

Table 3. Bond lengths [Å] and angles [°] for compound 2.

|                  |             |                     |            |
|------------------|-------------|---------------------|------------|
| Ag-P(3)          | 2.4537(3)   | C(9)-C(11)          | 1.5314(16) |
| Ag-P(3')         | 2.4714(3)   | C(9)-C(12)          | 1.5335(16) |
| Ag-Cl#1          | 2.5715(3)   | N(1')-C(2')         | 1.3614(13) |
| Ag-Cl            | 2.6340(3)   | N(1')-C(7A')        | 1.3869(13) |
| N(1)-C(2)        | 1.3549(13)  | N(1')-C(8')         | 1.4696(13) |
| N(1)-C(7A)       | 1.3919(13)  | C(2')-P(3')         | 1.7072(11) |
| N(1)-C(8)        | 1.4709(13)  | P(3')-C(3A')        | 1.7658(11) |
| C(2)-P(3)        | 1.7125(11)  | C(3A')-C(4')        | 1.4087(15) |
| P(3)-C(3A)       | 1.7699(11)  | C(3A')-C(7A')       | 1.4121(15) |
| C(3A)-C(4)       | 1.4074(15)  | C(4')-C(5')         | 1.3737(18) |
| C(3A)-C(7A)      | 1.4121(15)  | C(5')-C(6')         | 1.405(2)   |
| C(4)-C(5)        | 1.3777(19)  | C(6')-C(7')         | 1.3838(17) |
| C(5)-C(6)        | 1.402(2)    | C(7')-C(7A')        | 1.4030(15) |
| C(6)-C(7)        | 1.3822(17)  | C(8')-C(9')         | 1.5445(15) |
| C(7)-C(7A)       | 1.4025(15)  | C(9')-C(11')        | 1.5303(15) |
| C(8)-C(9)        | 1.5392(15)  | C(9')-C(12')        | 1.5315(15) |
| C(9)-C(10)       | 1.5308(15)  | C(9')-C(10')        | 1.5336(15) |
|                  |             |                     |            |
| P(3)-Ag-P(3')    | 106.815(10) | N(1)-C(7A)-C(7)     | 126.70(10) |
| P(3)-Ag-Cl#1     | 114.571(10) | N(1)-C(7A)-C(3A)    | 112.13(9)  |
| P(3')-Ag-Cl#1    | 115.576(10) | C(7)-C(7A)-C(3A)    | 121.17(10) |
| P(3)-Ag-Cl       | 121.406(10) | N(1)-C(8)-C(9)      | 115.26(8)  |
| P(3')-Ag-Cl      | 100.201(9)  | C(10)-C(9)-C(11)    | 110.17(9)  |
| Cl#1-Ag-Cl       | 97.793(8)   | C(10)-C(9)-C(12)    | 108.70(10) |
| Ag#1-Cl-Ag       | 82.206(8)   | C(11)-C(9)-C(12)    | 109.63(9)  |
| C(2)-N(1)-C(7A)  | 112.59(9)   | C(10)-C(9)-C(8)     | 106.22(9)  |
| C(2)-N(1)-C(8)   | 121.94(9)   | C(11)-C(9)-C(8)     | 111.06(9)  |
| C(7A)-N(1)-C(8)  | 125.39(9)   | C(12)-C(9)-C(8)     | 110.98(9)  |
| N(1)-C(2)-P(3)   | 115.06(8)   | C(2')-N(1')-C(7A')  | 112.95(9)  |
| C(2)-P(3)-C(3A)  | 89.18(5)    | C(2')-N(1')-C(8')   | 121.24(9)  |
| C(2)-P(3)-Ag     | 117.48(4)   | C(7A')-N(1')-C(8')  | 125.81(9)  |
| C(3A)-P(3)-Ag    | 133.89(4)   | N(1')-C(2')-P(3')   | 114.30(8)  |
| C(4)-C(3A)-C(7A) | 119.10(10)  | C(2')-P(3')-C(3A')  | 89.90(5)   |
| C(4)-C(3A)-P(3)  | 129.95(9)   | C(2')-P(3')-Ag      | 135.41(4)  |
| C(7A)-C(3A)-P(3) | 110.94(8)   | C(3A')-P(3')-Ag     | 131.36(4)  |
| C(5)-C(4)-C(3A)  | 119.60(11)  | C(4')-C(3A')-C(7A') | 119.44(10) |
| C(4)-C(5)-C(6)   | 120.56(11)  | C(4')-C(3A')-P(3')  | 129.93(9)  |
| C(7)-C(6)-C(5)   | 121.40(11)  | C(7A')-C(3A')-P(3') | 110.54(8)  |
| C(6)-C(7)-C(7A)  | 118.16(11)  | C(5')-C(4')-C(3A')  | 119.54(11) |

|                     |            |                     |           |
|---------------------|------------|---------------------|-----------|
| C(4')-C(5')-C(6')   | 120.59(11) | C(11')-C(9')-C(12') | 109.82(9) |
| C(7')-C(6')-C(5')   | 121.28(11) | C(11')-C(9')-C(10') | 109.56(9) |
| C(6')-C(7')-C(7A')  | 118.38(11) | C(12')-C(9')-C(10') | 109.36(9) |
| N(1')-C(7A')-C(7')  | 126.91(10) | C(11')-C(9')-C(8')  | 111.40(9) |
| N(1')-C(7A')-C(3A') | 112.29(9)  | C(12')-C(9')-C(8')  | 110.74(8) |
| C(7')-C(7A')-C(3A') | 120.77(10) | C(10')-C(9')-C(8')  | 105.88(9) |
| N(1')-C(8')-C(9')   | 115.10(8)  |                     |           |

---

Symmetry transformations used to generate equivalent atoms:

#1 -x,-y,-z+1

Table 4. Torsion angles [°] for compound 2.

|                          |              |                           |             |
|--------------------------|--------------|---------------------------|-------------|
| P(3)-Ag-Cl-Ag#1          | -125.120(10) | N(1')-C(2')-P(3')-Ag      | -160.17(6)  |
| P(3')-Ag-Cl-Ag#1         | 117.864(9)   | P(3)-Ag-P(3')-C(2')       | 12.01(5)    |
| C(7A)-N(1)-C(2)-P(3)     | 2.72(12)     | Cl#1-Ag-P(3')-C(2')       | -116.76(5)  |
| C(8)-N(1)-C(2)-P(3)      | 179.61(8)    | Cl-Ag-P(3')-C(2')         | 139.42(5)   |
| N(1)-C(2)-P(3)-C(3A)     | -3.07(9)     | P(3)-Ag-P(3')-C(3A')      | -140.84(5)  |
| N(1)-C(2)-P(3)-Ag        | -143.79(7)   | Cl#1-Ag-P(3')-C(3A')      | 90.39(5)    |
| P(3')-Ag-P(3)-C(2)       | -16.85(4)    | Cl-Ag-P(3')-C(3A')        | -13.43(5)   |
| Cl#1-Ag-P(3)-C(2)        | 112.50(4)    | C(2')-P(3')-C(3A')-C(4')  | 177.34(11)  |
| Cl-Ag-P(3)-C(2)          | -130.51(4)   | Ag-P(3')-C(3A')-C(4')     | -21.34(13)  |
| P(3')-Ag-P(3)-C(3A)      | -135.40(5)   | C(2')-P(3')-C(3A')-C(7A') | 0.89(8)     |
| Cl#1-Ag-P(3)-C(3A)       | -6.05(5)     | Ag-P(3')-C(3A')-C(7A')    | 162.21(6)   |
| Cl-Ag-P(3)-C(3A)         | 110.94(5)    | C(7A')-C(3A')-C(4')-C(5') | 0.82(17)    |
| C(2)-P(3)-C(3A)-C(4)     | -178.20(11)  | P(3')-C(3A')-C(4')-C(5')  | -175.37(9)  |
| Ag-P(3)-C(3A)-C(4)       | -49.40(13)   | C(3A')-C(4')-C(5')-C(6')  | -0.89(18)   |
| C(2)-P(3)-C(3A)-C(7A)    | 2.60(8)      | C(4')-C(5')-C(6')-C(7')   | 0.26(19)    |
| Ag-P(3)-C(3A)-C(7A)      | 131.40(6)    | C(5')-C(6')-C(7')-C(7A')  | 0.44(18)    |
| C(7A)-C(3A)-C(4)-C(5)    | -0.47(16)    | C(2')-N(1')-C(7A')-C(7')  | -176.73(10) |
| P(3)-C(3A)-C(4)-C(5)     | -179.62(9)   | C(8')-N(1')-C(7A')-C(7')  | 2.34(17)    |
| C(3A)-C(4)-C(5)-C(6)     | 0.92(18)     | C(2')-N(1')-C(7A')-C(3A') | 1.26(13)    |
| C(4)-C(5)-C(6)-C(7)      | -0.60(19)    | C(8')-N(1')-C(7A')-C(3A') | -179.66(9)  |
| C(5)-C(6)-C(7)-C(7A)     | -0.18(18)    | C(6')-C(7')-C(7A')-N(1')  | 177.34(11)  |
| C(2)-N(1)-C(7A)-C(7)     | 178.71(10)   | C(6')-C(7')-C(7A')-C(3A') | -0.50(16)   |
| C(8)-N(1)-C(7A)-C(7)     | 1.96(17)     | C(4')-C(3A')-C(7A')-N(1') | -178.26(9)  |
| C(2)-N(1)-C(7A)-C(3A)    | -0.59(13)    | P(3')-C(3A')-C(7A')-N(1') | -1.38(11)   |
| C(8)-N(1)-C(7A)-C(3A)    | -177.35(9)   | C(4')-C(3A')-C(7A')-C(7') | -0.12(16)   |
| C(6)-C(7)-C(7A)-N(1)     | -178.63(10)  | P(3')-C(3A')-C(7A')-C(7') | 176.76(8)   |
| C(6)-C(7)-C(7A)-C(3A)    | 0.62(16)     | C(2')-N(1')-C(8')-C(9')   | -88.93(12)  |
| C(4)-C(3A)-C(7A)-N(1)    | 179.05(10)   | C(7A')-N(1')-C(8')-C(9')  | 92.07(12)   |
| P(3)-C(3A)-C(7A)-N(1)    | -1.66(11)    | N(1')-C(8')-C(9')-C(11')  | -69.96(12)  |
| C(4)-C(3A)-C(7A)-C(7)    | -0.30(16)    | N(1')-C(8')-C(9')-C(12')  | 52.58(12)   |
| P(3)-C(3A)-C(7A)-C(7)    | 178.99(8)    | N(1')-C(8')-C(9')-C(10')  | 171.02(9)   |
| C(2)-N(1)-C(8)-C(9)      | 86.68(12)    |                           |             |
| C(7A)-N(1)-C(8)-C(9)     | -96.85(12)   |                           |             |
| N(1)-C(8)-C(9)-C(10)     | -174.77(9)   |                           |             |
| N(1)-C(8)-C(9)-C(11)     | 65.43(12)    |                           |             |
| N(1)-C(8)-C(9)-C(12)     | -56.78(12)   |                           |             |
| C(7A')-N(1')-C(2')-P(3') | -0.57(12)    |                           |             |
| C(8')-N(1')-C(2')-P(3')  | -179.69(7)   |                           |             |
| N(1')-C(2')-P(3')-C(3A') | -0.20(8)     |                           |             |

Symmetry transformations used to generate equivalent atoms:

#1 -x,-y,-z+1



Table 1. Crystal data and structure refinement for compound **5**.

|                                   |                                                                   |                |
|-----------------------------------|-------------------------------------------------------------------|----------------|
| Identification code               | grehg                                                             |                |
| Empirical formula                 | C <sub>26</sub> H <sub>21</sub> Cl <sub>2</sub> HgNP <sub>2</sub> |                |
| Formula weight                    | 680.87                                                            |                |
| Temperature                       | 100(2) K                                                          |                |
| Wavelength                        | 0.71073 Å                                                         |                |
| Crystal system                    | Monoclinic                                                        |                |
| Space group                       | P2 <sub>1</sub> /c                                                |                |
| Unit cell dimensions              | a = 9.3339(3) Å                                                   | α = 90°        |
|                                   | b = 28.7742(9) Å                                                  | β = 94.243(4)° |
|                                   | c = 9.6247(3) Å                                                   | γ = 90°        |
| Volume                            | 2577.87(14) Å <sup>3</sup>                                        |                |
| Z                                 | 4                                                                 |                |
| Density (calculated)              | 1.754 Mg/m <sup>3</sup>                                           |                |
| Absorption coefficient            | 6.316 mm <sup>-1</sup>                                            |                |
| F(000)                            | 1312                                                              |                |
| Crystal size                      | 0.20 x 0.15 x 0.05 mm <sup>3</sup>                                |                |
| Theta range for data collection   | 2.19 to 30.03°                                                    |                |
| Index ranges                      | -12 ≤ h ≤ 13, -40 ≤ k ≤ 40, -13 ≤ l ≤ 13                          |                |
| Reflections collected             | 96745                                                             |                |
| Independent reflections           | 7494 [R(int) = 0.0520]                                            |                |
| Completeness to theta = 30.03°    | 99.3 %                                                            |                |
| Absorption correction             | Semi-empirical from equivalents                                   |                |
| Max. and min. transmission        | 1.00000 and 0.59323                                               |                |
| Refinement method                 | Full-matrix least-squares on F <sup>2</sup>                       |                |
| Data / restraints / parameters    | 7494 / 0 / 294                                                    |                |
| Goodness-of-fit on F <sup>2</sup> | 1.127                                                             |                |
| Final R indices [I > 2σ(I)]       | R1 = 0.0255, wR2 = 0.0426                                         |                |
| R indices (all data)              | R1 = 0.0333, wR2 = 0.0442                                         |                |
| Largest diff. peak and hole       | 0.768 and -0.915 e.Å <sup>-3</sup>                                |                |

Table 2. Atomic coordinates ( $\times 10^4$ ) and equivalent isotropic displacement parameters ( $\text{\AA}^2 \times 10^3$ ) for compound **5**.  $U(\text{eq})$  is defined as one third of the trace of the orthogonalized  $U_{ij}$  tensor.

|       | x         | y          | z         | $U(\text{eq})$ |
|-------|-----------|------------|-----------|----------------|
| Hg    | 2387.6(1) | 1313.9(1)  | 3632.2(1) | 16.3(1)        |
| Cl(1) | 1163.8(6) | 1042.0(2)  | 5621.7(6) | 18.0(1)        |
| Cl(2) | 3558.0(7) | 2070.2(2)  | 4193.8(7) | 21.2(1)        |
| P(1)  | 3583.6(6) | 812.7(2)   | 2017.6(6) | 12.5(1)        |
| N(1)  | 1582(2)   | 2153.9(7)  | 564(2)    | 16.5(4)        |
| C(2)  | 1721(3)   | 1689.1(8)  | 598(3)    | 15.0(5)        |
| P(3)  | 363.9(7)  | 1419.6(2)  | 1505.6(7) | 15.8(1)        |
| C(3A) | -285(3)   | 1981.2(8)  | 1940(3)   | 16.4(5)        |
| C(4)  | -1384(3)  | 2114.7(9)  | 2777(3)   | 19.5(5)        |
| C(5)  | -1692(3)  | 2579.6(9)  | 2978(3)   | 21.2(5)        |
| C(6)  | -906(3)   | 2919.3(9)  | 2296(3)   | 23.4(6)        |
| C(7)  | 178(3)    | 2801.3(9)  | 1456(3)   | 21.0(5)        |
| C(7A) | 490(3)    | 2331.7(8)  | 1303(3)   | 16.8(5)        |
| C(8)  | -2846(3)  | 2721.3(10) | 3915(3)   | 29.0(7)        |
| C(11) | 3746(3)   | 1098.4(8)  | 353(2)    | 14.3(5)        |
| C(12) | 2880(3)   | 1473.3(8)  | -157(3)   | 14.5(5)        |
| C(13) | 3150(3)   | 1665.0(9)  | -1454(3)  | 20.1(5)        |
| C(14) | 4217(3)   | 1493.1(9)  | -2235(3)  | 21.6(5)        |
| C(15) | 5074(3)   | 1128.8(9)  | -1726(3)  | 20.4(5)        |
| C(16) | 4848(3)   | 936.1(9)   | -441(3)   | 18.2(5)        |
| C(21) | 2554(2)   | 287.0(8)   | 1679(2)   | 13.9(5)        |
| C(22) | 2064(3)   | 50.4(9)    | 2815(3)   | 22.2(6)        |
| C(23) | 1342(3)   | -369.0(10) | 2618(3)   | 26.0(6)        |
| C(24) | 1092(3)   | -549.3(9)  | 1293(3)   | 20.3(5)        |
| C(25) | 1561(3)   | -314.3(9)  | 159(3)    | 21.4(5)        |
| C(26) | 2287(3)   | 103.4(9)   | 352(3)    | 17.8(5)        |
| C(31) | 5372(3)   | 629.9(8)   | 2645(3)   | 15.0(5)        |
| C(32) | 6334(3)   | 972.0(9)   | 3167(3)   | 21.1(5)        |
| C(33) | 7706(3)   | 846.9(10)  | 3684(3)   | 23.7(6)        |
| C(34) | 8116(3)   | 383.7(10)  | 3697(3)   | 22.9(6)        |
| C(35) | 7162(3)   | 43.5(10)   | 3208(3)   | 23.0(6)        |
| C(36) | 5788(3)   | 165.2(9)   | 2683(3)   | 18.2(5)        |

Table 3. Bond lengths [Å] and angles [°] for compound **5**.

|                  |            |                   |            |
|------------------|------------|-------------------|------------|
| Hg-Cl(1)         | 2.4305(6)  | C(11)-C(16)       | 1.405(3)   |
| Hg-P(1)          | 2.4489(6)  | C(11)-C(12)       | 1.415(3)   |
| Hg-Cl(2)         | 2.4766(6)  | C(12)-C(13)       | 1.404(3)   |
| Hg-P(3)          | 2.6978(7)  | C(13)-C(14)       | 1.383(4)   |
| P(1)-C(21)       | 1.809(2)   | C(14)-C(15)       | 1.386(4)   |
| P(1)-C(31)       | 1.811(2)   | C(15)-C(16)       | 1.386(4)   |
| P(1)-C(11)       | 1.817(2)   | C(21)-C(26)       | 1.388(3)   |
| N(1)-C(2)        | 1.344(3)   | C(21)-C(22)       | 1.394(3)   |
| N(1)-C(7A)       | 1.383(3)   | C(22)-C(23)       | 1.388(4)   |
| C(2)-C(12)       | 1.483(3)   | C(23)-C(24)       | 1.381(4)   |
| C(2)-P(3)        | 1.770(3)   | C(24)-C(25)       | 1.382(4)   |
| P(3)-C(3A)       | 1.786(3)   | C(25)-C(26)       | 1.386(3)   |
| C(3A)-C(4)       | 1.405(4)   | C(31)-C(36)       | 1.392(3)   |
| C(3A)-C(7A)      | 1.408(3)   | C(31)-C(32)       | 1.401(3)   |
| C(4)-C(5)        | 1.385(4)   | C(32)-C(33)       | 1.386(4)   |
| C(5)-C(6)        | 1.413(4)   | C(33)-C(34)       | 1.387(4)   |
| C(5)-C(8)        | 1.511(4)   | C(34)-C(35)       | 1.383(4)   |
| C(6)-C(7)        | 1.384(4)   | C(35)-C(36)       | 1.388(4)   |
| C(7)-C(7A)       | 1.392(3)   |                   |            |
| Cl(1)-Hg-P(1)    | 124.98(2)  | C(2)-P(3)-Hg      | 86.40(8)   |
| Cl(1)-Hg-Cl(2)   | 109.65(2)  | C(3A)-P(3)-Hg     | 98.92(8)   |
| P(1)-Hg-Cl(2)    | 116.20(2)  | C(4)-C(3A)-C(7A)  | 118.3(2)   |
| Cl(1)-Hg-P(3)    | 106.89(2)  | C(4)-C(3A)-P(3)   | 131.0(2)   |
| P(1)-Hg-P(3)     | 84.92(2)   | C(7A)-C(3A)-P(3)  | 110.63(19) |
| Cl(2)-Hg-P(3)    | 109.83(2)  | C(5)-C(4)-C(3A)   | 120.8(2)   |
| C(21)-P(1)-C(31) | 106.35(11) | C(4)-C(5)-C(6)    | 118.9(2)   |
| C(21)-P(1)-C(11) | 107.31(11) | C(4)-C(5)-C(8)    | 120.5(2)   |
| C(31)-P(1)-C(11) | 106.86(11) | C(6)-C(5)-C(8)    | 120.5(2)   |
| C(21)-P(1)-Hg    | 110.22(8)  | C(7)-C(6)-C(5)    | 122.0(2)   |
| C(31)-P(1)-Hg    | 114.32(8)  | C(6)-C(7)-C(7A)   | 117.9(2)   |
| C(11)-P(1)-Hg    | 111.40(8)  | N(1)-C(7A)-C(7)   | 125.5(2)   |
| C(2)-N(1)-C(7A)  | 115.4(2)   | N(1)-C(7A)-C(3A)  | 112.4(2)   |
| N(1)-C(2)-C(12)  | 118.5(2)   | C(7)-C(7A)-C(3A)  | 122.1(2)   |
| N(1)-C(2)-P(3)   | 112.14(18) | C(16)-C(11)-C(12) | 119.1(2)   |
| C(12)-C(2)-P(3)  | 129.25(18) | C(16)-C(11)-P(1)  | 116.20(18) |
| C(2)-P(3)-C(3A)  | 89.22(12)  | C(12)-C(11)-P(1)  | 124.63(19) |

|                   |            |
|-------------------|------------|
| C(13)-C(12)-C(11) | 118.2(2)   |
| C(13)-C(12)-C(2)  | 117.2(2)   |
| C(11)-C(12)-C(2)  | 124.6(2)   |
| C(14)-C(13)-C(12) | 121.8(2)   |
| C(13)-C(14)-C(15) | 119.9(2)   |
| C(16)-C(15)-C(14) | 119.7(2)   |
| C(15)-C(16)-C(11) | 121.2(2)   |
| C(26)-C(21)-C(22) | 119.3(2)   |
| C(26)-C(21)-P(1)  | 122.73(19) |
| C(22)-C(21)-P(1)  | 117.91(18) |
| C(23)-C(22)-C(21) | 120.1(2)   |
| C(24)-C(23)-C(22) | 120.0(3)   |
| C(23)-C(24)-C(25) | 120.3(2)   |
| C(24)-C(25)-C(26) | 119.9(2)   |
| C(25)-C(26)-C(21) | 120.4(2)   |
| C(36)-C(31)-C(32) | 119.7(2)   |
| C(36)-C(31)-P(1)  | 122.43(19) |
| C(32)-C(31)-P(1)  | 117.80(19) |
| C(33)-C(32)-C(31) | 119.8(2)   |
| C(32)-C(33)-C(34) | 120.0(3)   |
| C(35)-C(34)-C(33) | 120.4(2)   |
| C(34)-C(35)-C(36) | 120.0(2)   |
| C(35)-C(36)-C(31) | 120.0(2)   |

Table 4. Hydrogen bonds [ $\text{\AA}$  and  $^\circ$ ] for compound **5**.

| D-H...A               | d(D-H)  | d(H...A) | d(D...A) | $\angle(\text{DHA})$ |
|-----------------------|---------|----------|----------|----------------------|
| N(1)-H(01)...Cl(2)#1  | 0.83(3) | 2.42(3)  | 3.238(2) | 169(3)               |
| C(7)-H(7)...Cl(1)#1   | 0.95    | 2.73     | 3.560(3) | 147.1                |
| C(23)-H(23)...Cl(1)#2 | 0.95    | 2.74     | 3.560(3) | 145.5                |
| C(35)-H(35)...Cl(1)#3 | 0.95    | 2.75     | 3.634(3) | 154.6                |

Symmetry transformations used to generate equivalent atoms:

#1  $x, -y+1/2, z-1/2$

#2  $-x, -y, -z+1$

#3  $-x+1, -y, -z+1$

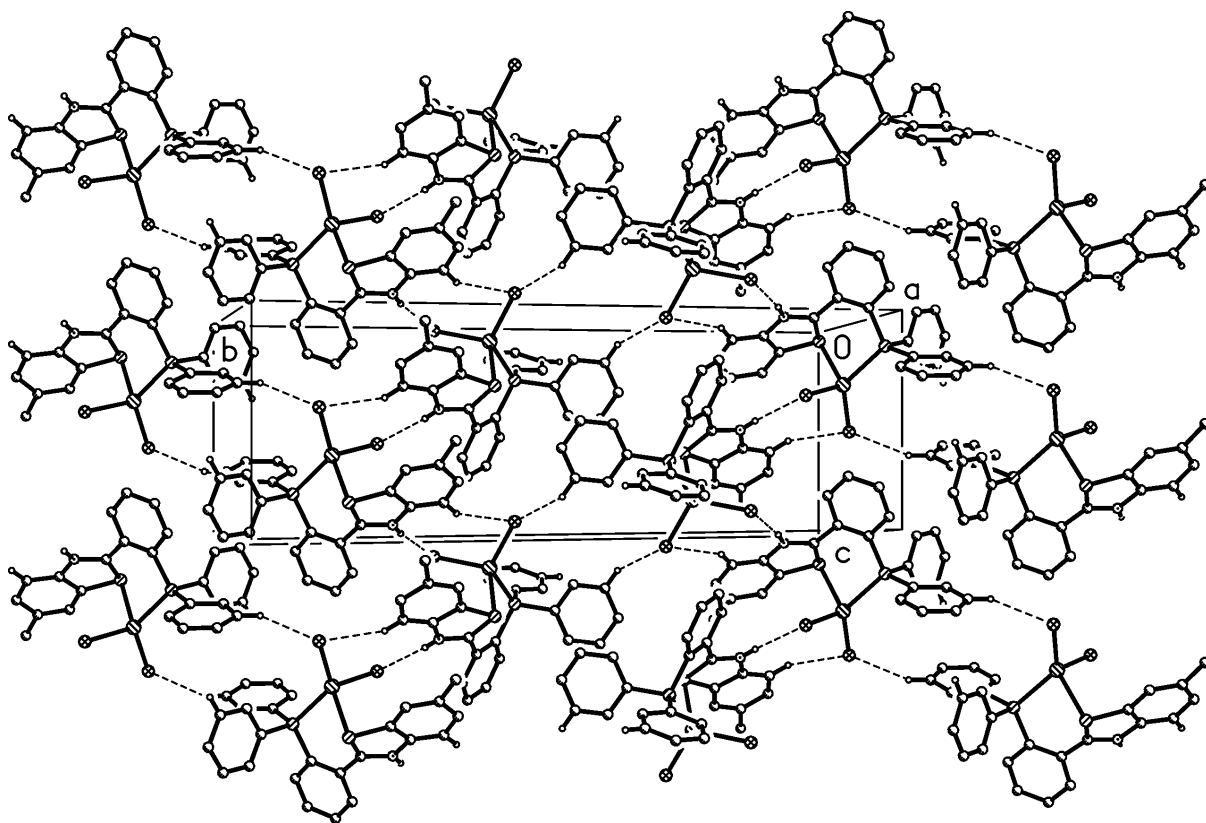

Packing of HgCl<sub>2</sub> complex **5**
